# Supplementary material
Source: PubMed Central journal article supplement (PMC9973034)
Supplement: jvi.01716-22-s0001.pdf [file jvi.01716-22-s0001.pdf]

**Figure S1:** GII.4 Sydney\_2012 noroviruses present two predominant polymerase types, [P16] and [P31]. (A) Yearly distribution of all GII.4 Sydney\_2012 sequences (n= 1237) available in public databases (11), from which the polymerase types were sequenced and characterized. (B) Phylogenetic tree of the major capsid protein (VP1) from GII.4 Sydney\_2012 noroviruses. The tips of the time-scaled phylogenetic tree were color-coded based on the polymerase type presented by every viral sequence. The analyses were done using 1449 complete (or near-complete) sequences of Sydney\_2012 noroviruses. The phylogenetic trees were calculated as indicated in Figure 1 and the Materials and Methods section.

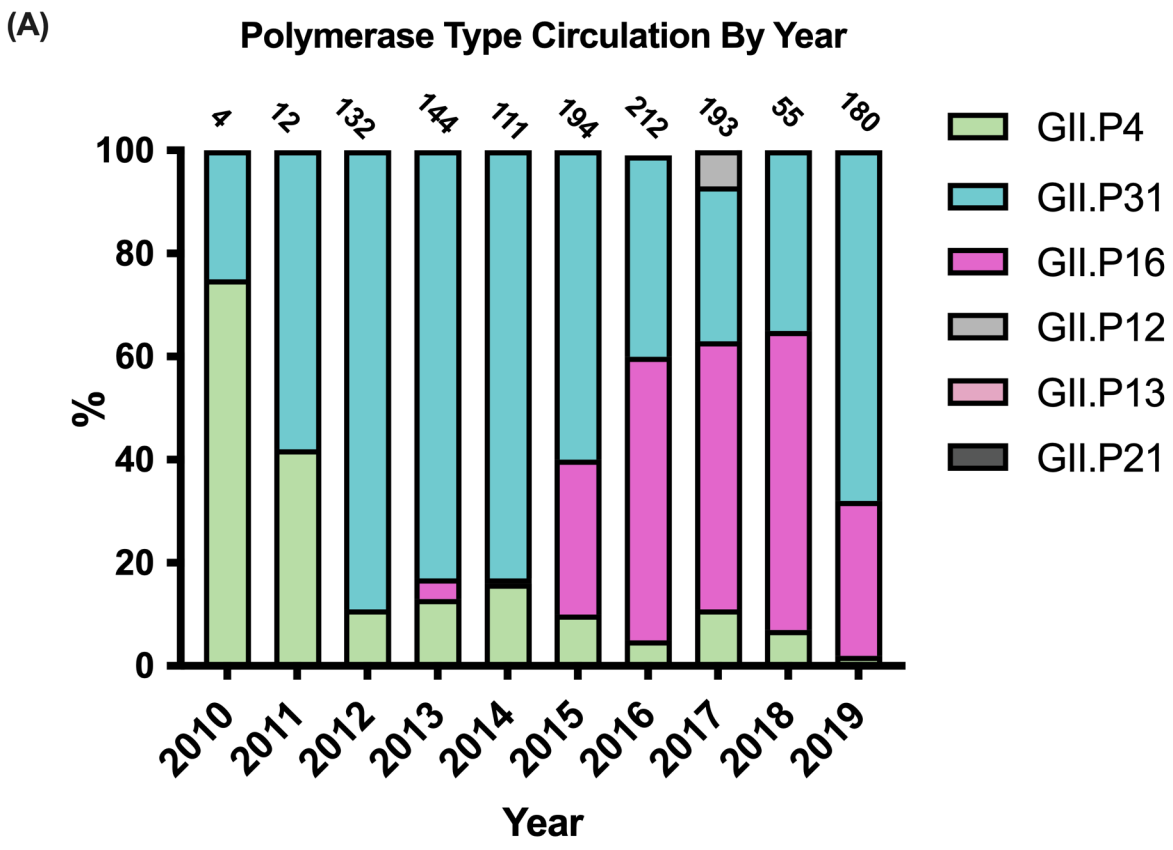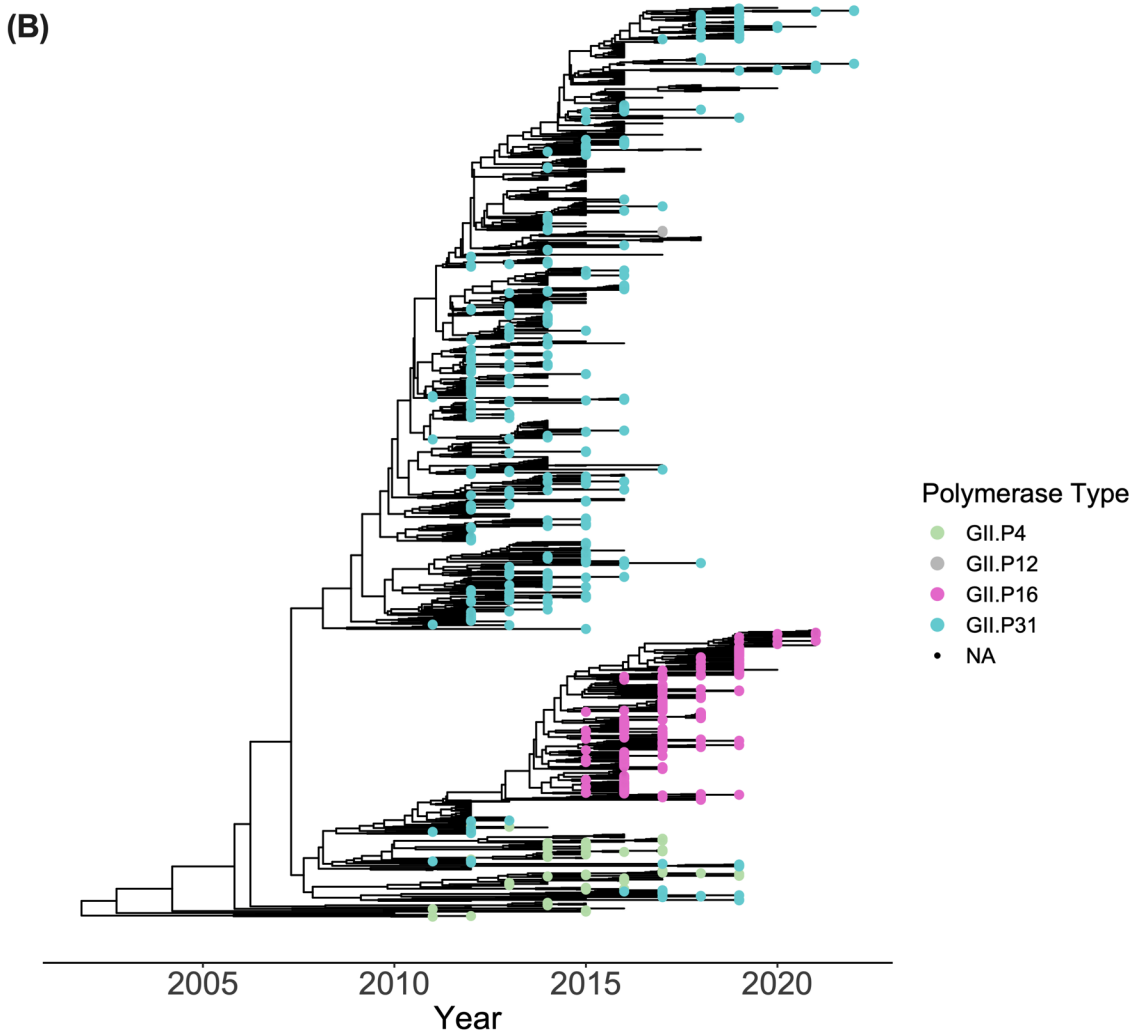

**Figure S2:** Temporal analyses of divergence of GII.4 Sydney\_2012 noroviruses. Root-to-tip divergence of nucleotide sequences on the maximum-likelihood tree was calculated using the same dataset used for time-scaled phylogenetic tree reconstruction from Figure 1.

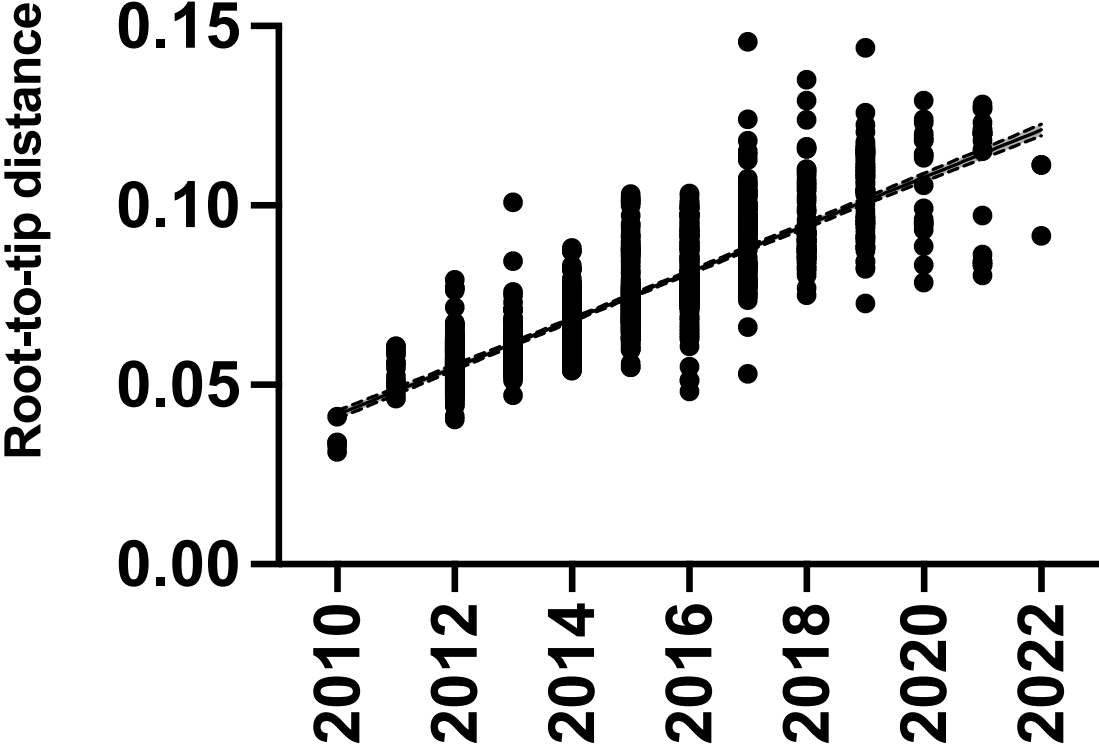

**Figure S3:** Polyclonal sera responses to wild-type and mutant VLPs from animals immunized with RockvilleD1/US/2012 VLPs and the MD2004-3/US/2004 (a Farmington\_Hills\_2002 virus) VLPs. Normalized curves are shown for each mouse serum. The EC50 from each curve was used to plot the heatmap from Figure 7B.

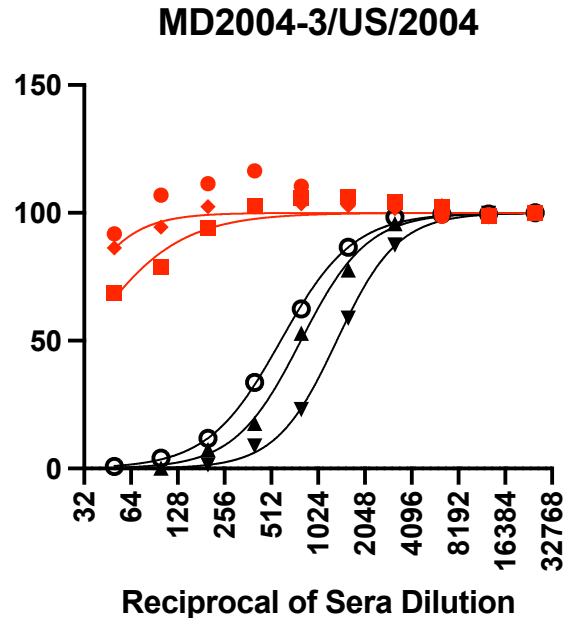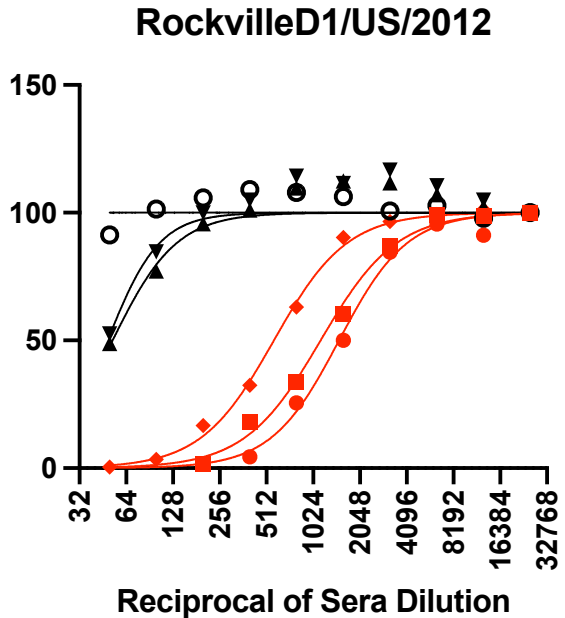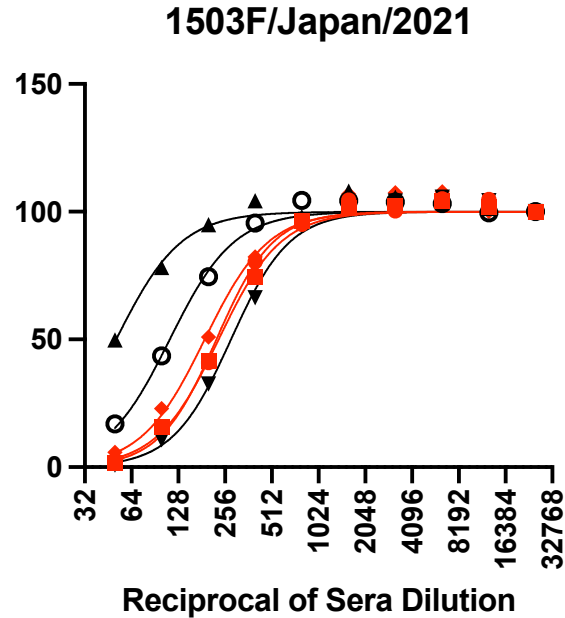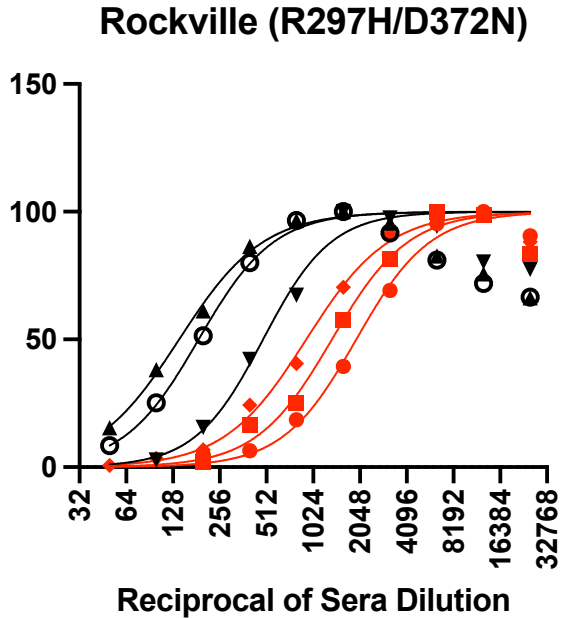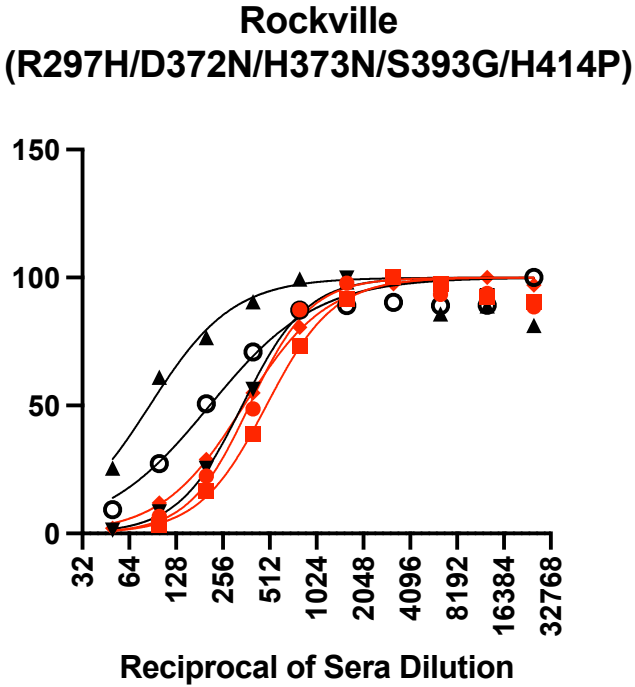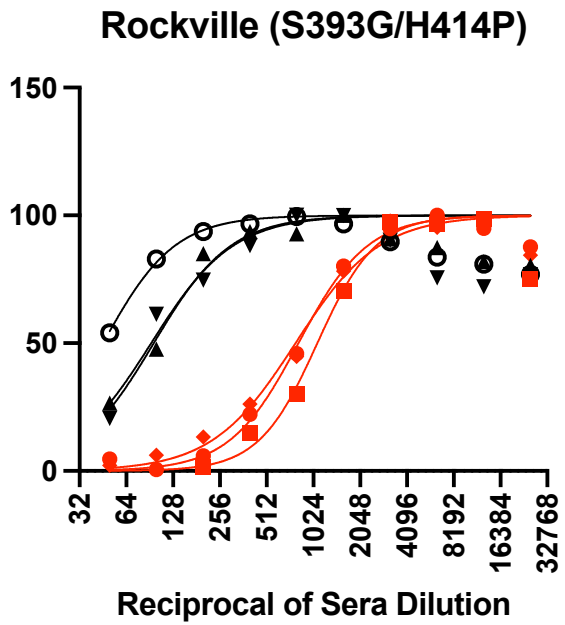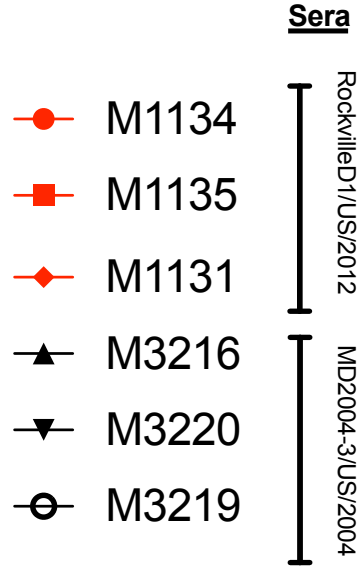

**Figure S4:** Three-dimensional model of the P domain of GII.4 norovirus VP1 showing the variable antigenic sites. The structural model of the P domain dimer was acquired from the Protein Database (PDB: 2OBS) and the figure was rendered using UCSF Chimera.

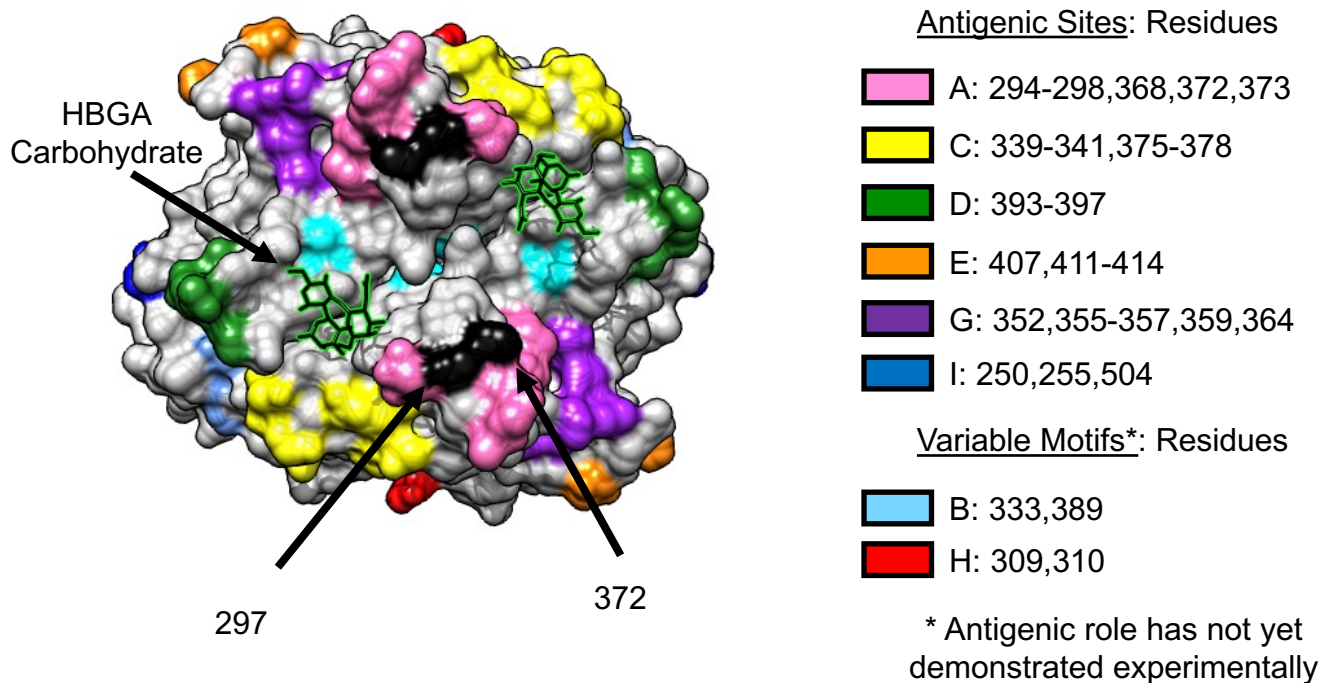

**Table S1:** Country and year of detection from Sydney 2012 viruses included in this study

| Continent | Country        | Years    |           |            |            |            |            |            |            |           |           |           |           |          |             | Total |
|-----------|----------------|----------|-----------|------------|------------|------------|------------|------------|------------|-----------|-----------|-----------|-----------|----------|-------------|-------|
|           |                | 2010     | 2011      | 2012       | 2013       | 2014       | 2015       | 2016       | 2017       | 2018      | 2019      | 2020      | 2021      | 2022     |             |       |
| Americas  | Argentina      |          |           | 1          |            | 4          | 1          | 5          | 1          |           |           |           |           |          | 12          |       |
|           | Brazil         |          |           | 3          | 5          | 6          | 4          | 2          |            |           |           |           |           |          | 20          |       |
|           | Canada         |          | 1         | 1          | 1          | 1          | 6          | 3          | 1          | 2         | 11        |           |           |          | 27          |       |
|           | Mexico         |          |           |            |            |            |            | 3          | 1          |           |           |           |           |          | 4           |       |
|           | Paraguay       |          |           |            |            |            |            | 5          |            |           |           |           |           |          | 5           |       |
|           | Peru           |          |           |            | 3          | 2          |            |            |            |           |           |           |           |          | 5           |       |
|           | United_States  |          | 1         | 38         | 26         | 19         | 47         | 34         | 57         | 22        | 2         |           |           |          | 246         |       |
| Africa    | Botswana       |          |           |            |            |            |            | 1          | 9          | 1         |           |           |           |          | 11          |       |
|           | Cambodia       |          |           |            |            |            | 1          |            |            |           |           |           |           |          | 1           |       |
|           | Egypt          |          |           |            |            |            |            | 4          |            |           |           |           |           |          | 4           |       |
|           | Kenya          |          |           |            |            |            |            |            |            |           | 5         |           |           |          | 5           |       |
|           | South_Africa   | 2        | 2         | 5          | 8          |            |            |            |            |           |           |           |           |          | 17          |       |
| Asia      | Bangladesh     |          |           | 4          |            |            |            |            |            |           |           |           |           |          | 4           |       |
|           | Bhutan         |          |           | 7          |            |            | 1          |            |            |           |           |           |           |          | 8           |       |
|           | China          |          |           | 20         | 14         | 11         | 86         | 131        | 7          | 20        | 22        | 9         | 14        |          | 334         |       |
|           | Hong_Kong      |          |           | 3          | 1          | 145        | 23         | 1          | 15         |           |           |           |           |          | 188         |       |
|           | India          |          |           |            | 3          |            |            |            |            | 8         | 30        |           |           |          | 41          |       |
|           | Indonesia      |          |           |            |            |            |            | 8          |            |           |           |           |           |          | 8           |       |
|           | Japan          |          | 11        | 68         | 31         | 16         | 1          | 4          | 4          |           | 3         | 8         | 7         | 3        | 156         |       |
|           | Nepal          |          |           |            | 2          | 1          |            |            |            |           |           |           |           |          | 3           |       |
|           | South_Korea    |          |           | 1          | 1          |            |            |            |            |           |           |           |           |          | 2           |       |
|           | Taiwan         |          |           | 16         | 6          | 4          | 2          | 18         |            | 1         |           |           |           |          | 47          |       |
|           | Thailand       |          |           |            |            |            | 1          |            | 4          | 24        | 5         | 3         |           |          | 37          |       |
| Viet_Nam  |                |          |           | 2          | 1          | 4          |            |            |            |           |           |           |           | 7        |             |       |
| Europe    | France         |          |           | 7          | 1          | 2          |            |            |            |           |           |           |           |          | 10          |       |
|           | Germany        |          |           |            |            | 15         |            | 1          |            |           |           |           |           |          | 16          |       |
|           | Hungary        |          |           |            |            |            | 1          |            |            |           |           |           |           |          | 1           |       |
|           | Italy          |          | 1         | 2          | 1          |            |            |            |            |           |           |           |           |          | 4           |       |
|           | Netherlands    |          |           | 2          |            | 1          |            |            |            |           |           |           |           |          | 3           |       |
|           | Russia         |          |           | 1          |            |            |            | 3          | 2          | 1         |           |           |           |          | 7           |       |
|           | Spain          |          |           |            |            |            |            | 3          |            |           | 3         |           |           |          | 6           |       |
|           | United_Kingdom |          |           |            | 4          | 29         | 36         | 6          |            |           |           |           |           |          | 75          |       |
| Oceania   | Australia      |          |           | 47         | 8          | 6          | 10         | 15         | 17         |           |           |           |           |          | 103         |       |
|           | New_Zealand    | 3        |           | 29         |            |            |            |            |            |           |           |           |           |          | 32          |       |
|           | <b>Total</b>   | <b>5</b> | <b>16</b> | <b>255</b> | <b>117</b> | <b>263</b> | <b>224</b> | <b>247</b> | <b>118</b> | <b>79</b> | <b>81</b> | <b>20</b> | <b>21</b> | <b>3</b> | <b>1449</b> |       |

**Table S2. Sequence dataset**

| <b>No</b> | <b>Accession Number</b> | <b>Strain</b>  | <b>Country</b> | <b>Year</b> | <b>Polymerase Type</b> |
|-----------|-------------------------|----------------|----------------|-------------|------------------------|
| 1         | AB972466                | Hokkaido4      | Japan          | 2012        | GII.P31                |
| 2         | AB972467                | Aomori2        | Japan          | 2012        | GII.P31                |
| 3         | AB972468                | Aomori3        | Japan          | 2012        | GII.P31                |
| 4         | AB972469                | Aomori5        | Japan          | 2012        | GII.P31                |
| 5         | AB972470                | Akita4         | Japan          | 2012        | GII.P31                |
| 6         | AB972472                | Iwate4         | Japan          | 2012        | GII.P31                |
| 7         | AB972473                | Iwate5         | Japan          | 2012        | GII.P31                |
| 8         | AB972475                | Saitama2       | Japan          | 2012        | GII.P31                |
| 9         | AB972477                | Niigata4       | Japan          | 2012        | GII.P31                |
| 10        | AB972478                | Fukui3         | Japan          | 2012        | GII.P31                |
| 11        | AB972479                | Fukui4         | Japan          | 2012        | GII.P31                |
| 12        | AB972480                | Fukui6         | Japan          | 2012        | GII.P31                |
| 13        | AB972481                | Fukui7         | Japan          | 2012        | GII.P31                |
| 14        | AB972482                | Fukui8         | Japan          | 2012        | GII.P31                |
| 15        | AB972483                | Ehime5         | Japan          | 2012        | GII.P31                |
| 16        | AB972484                | OsakaCity1     | Japan          | 2012        | GII.P31                |
| 17        | AB972485                | OsakaCity2     | Japan          | 2012        | GII.P31                |
| 18        | AB972487                | Sakai1         | Japan          | 2012        | GII.P31                |
| 19        | AB972488                | Sakai2         | Japan          | 2012        | GII.P31                |
| 20        | AB972489                | Sakai3         | Japan          | 2012        | GII.P31                |
| 21        | AB972490                | Sakai4         | Japan          | 2012        | GII.P31                |
| 22        | AB972491                | Sakai5         | Japan          | 2012        | GII.P31                |
| 23        | AB972492                | Shimane3       | Japan          | 2012        | GII.P31                |
| 24        | AB972493                | Shimane5       | Japan          | 2012        | GII.P31                |
| 25        | AB972494                | Hiroshima4     | Japan          | 2012        | GII.P31                |
| 26        | AB972495                | Hiroshima5     | Japan          | 2012        | GII.P31                |
| 27        | AB972496                | HiroshimaCity3 | Japan          | 2012        | GII.P31                |
| 28        | AB972497                | HiroshimaCity4 | Japan          | 2012        | GII.P31                |
| 29        | AB972498                | Ehime3         | Japan          | 2012        | GII.P31                |
| 30        | AB972499                | GII4-HK01      | Japan          | 2011        | GII.P31                |
| 31        | AB972502                | GII4-NG1242    | Japan          | 2011        | GII.P31                |
| 32        | AB972503                | GII4-NG1315    | Japan          | 2011        | GII.P31                |
| 33        | AB972504                | GII4-NG1343    | Japan          | 2011        | GII.P31                |
| 34        | AB972505                | GII4-NG1365    | Japan          | 2011        | GII.P31                |
| 35        | AB972507                | Hokkaido3      | Japan          | 2012        | NA                     |
| 36        | AB972508                | Hokkaido5      | Japan          | 2012        | NA                     |
| 37        | AB972510                | Aomori4        | Japan          | 2012        | NA                     |
| 38        | AB972512                | Akita2         | Japan          | 2012        | NA                     |
| 39        | AB972516                | Aichi2         | Japan          | 2012        | NA                     |
| 40        | AB972517                | Aichi3         | Japan          | 2012        | NA                     |
| 41        | AB972518                | Aichi4         | Japan          | 2012        | NA                     |
| 42        | AB972519                | Aichi5         | Japan          | 2012        | NA                     |
| 43        | AB972520                | Aichi6         | Japan          | 2012        | NA                     |
| 44        | AB972521                | Ehime4         | Japan          | 2012        | NA                     |
| 45        | AB972522                | Niigata2       | Japan          | 2012        | NA                     |
| 46        | AB972523                | Toyama1        | Japan          | 2012        | NA                     |
| 47        | AB972524                | Toyama3        | Japan          | 2012        | NA                     |
| 48        | AB972526                | Fukui5         | Japan          | 2012        | NA                     |

|     |          |                   |              |      |         |
|-----|----------|-------------------|--------------|------|---------|
| 49  | AB972527 | OsakaCity3        | Japan        | 2012 | NA      |
| 50  | AB972528 | Hiroshima1        | Japan        | 2012 | NA      |
| 51  | AB972529 | Hiroshima2        | Japan        | 2012 | NA      |
| 52  | AB972530 | Hiroshima3        | Japan        | 2012 | NA      |
| 53  | AB972531 | Shimane1          | Japan        | 2012 | NA      |
| 54  | AB972532 | Shimane2          | Japan        | 2012 | NA      |
| 55  | AB972533 | Shimane4          | Japan        | 2012 | NA      |
| 56  | JX459907 | NSW3309           | Australia    | 2012 | GII.P31 |
| 57  | JX459908 | NSW0514           | Australia    | 2012 | GII.P31 |
| 58  | JX629458 | CUHK3655          | Hong Kong    | 2012 | NA      |
| 59  | KC175323 | Hong_Kong         | Hong Kong    | 2012 | GII.P31 |
| 60  | KC243078 | Taichung          | Taiwan       | 2012 | NA      |
| 61  | KC456070 | VP1172            | China        | 2012 | NA      |
| 62  | KC456071 | VP1214            | China        | 2012 | NA      |
| 63  | KC456072 | VP1281            | China        | 2012 | NA      |
| 64  | KC456073 | VP1451            | China        | 2012 | NA      |
| 65  | KC473544 | Huzhou121         | China        | 2012 | NA      |
| 66  | KC473545 | Huzhou122         | China        | 2012 | NA      |
| 67  | KC473546 | Huzhou128         | China        | 2012 | NA      |
| 68  | KC517361 | CGMH51            | Taiwan       | 2012 | GII.P31 |
| 69  | KC517362 | CGMH52            | Taiwan       | 2012 | GII.P31 |
| 70  | KC517364 | CGMH54            | Taiwan       | 2012 | GII.P31 |
| 71  | KC517370 | CGMH60            | Taiwan       | 2012 | NA      |
| 72  | KC517374 | CGMH64            | Taiwan       | 2012 | NA      |
| 73  | KC517375 | CGMH65            | Taiwan       | 2012 | NA      |
| 74  | KC517376 | CGMH66            | Taiwan       | 2012 | GII.P31 |
| 75  | KC517377 | CGMH67            | Taiwan       | 2012 | GII.P31 |
| 76  | KC517378 | CapeTown          | Taiwan       | 2012 | GII.P31 |
| 77  | KC577175 | Jiangsu2          | China        | 2012 | GII.P31 |
| 78  | KC631827 | CUHK6080          | Hong Kong    | 2012 | GII.P31 |
| 79  | KC792281 | 12-BQ-1           | Taiwan       | 2012 | NA      |
| 80  | KC792282 | 12-CD-2-4         | Taiwan       | 2012 | NA      |
| 81  | KC962462 | Empangeni8491     | South Africa | 2011 | GII.P4  |
| 82  | KF008239 | Paray_le          | France       | 2012 | NA      |
| 83  | KF008240 | La_Grande         | France       | 2012 | NA      |
| 84  | KF008241 | Paris-E8509       | France       | 2012 | NA      |
| 85  | KF008242 | Cuers-E8549       | France       | 2012 | NA      |
| 86  | KF008243 | Saint_Germain_en  | France       | 2012 | NA      |
| 87  | KF008244 | Paris-E8635       | France       | 2012 | NA      |
| 88  | KF059999 | NSW007P           | Australia    | 2012 | NA      |
| 89  | KF060004 | NSW078G           | Australia    | 2012 | NA      |
| 90  | KF060009 | NSW114H           | Australia    | 2012 | NA      |
| 91  | KF060020 | NSW2304           | Australia    | 2012 | NA      |
| 92  | KF060021 | NSW230B           | Australia    | 2012 | NA      |
| 93  | KF060023 | NSW2586           | Australia    | 2012 | NA      |
| 94  | KF060026 | NSW285P           | Australia    | 2012 | NA      |
| 95  | KF060027 | NSW2949           | Australia    | 2012 | NA      |
| 96  | KF060029 | NSW310B           | Australia    | 2012 | NA      |
| 97  | KF060030 | Sutherlad_NSW311A | Australia    | 2012 | NA      |
| 98  | KF060031 | Randwick_NSW311A  | Australia    | 2012 | NA      |
| 99  | KF060033 | NSW3192           | Australia    | 2012 | NA      |
| 100 | KF060041 | NSW369N           | Australia    | 2012 | NA      |

|     |          |             |             |      |         |
|-----|----------|-------------|-------------|------|---------|
| 101 | KF060042 | NSW389W     | Australia   | 2012 | NA      |
| 102 | KF060046 | NSW426E     | Australia   | 2012 | NA      |
| 103 | KF060056 | NSW489T     | Australia   | 2012 | NA      |
| 104 | KF060062 | NSW558V     | Australia   | 2012 | NA      |
| 105 | KF060067 | NSW576T     | Australia   | 2012 | NA      |
| 106 | KF060073 | NSW596Q     | Australia   | 2012 | NA      |
| 107 | KF060076 | NSW615H     | Australia   | 2012 | NA      |
| 108 | KF060080 | NSW628G     | Australia   | 2012 | NA      |
| 109 | KF060087 | NSW676P     | Australia   | 2012 | NA      |
| 110 | KF060089 | NSW684S     | Australia   | 2012 | NA      |
| 111 | KF060096 | NSW746S     | Australia   | 2012 | NA      |
| 112 | KF060097 | NSW748N     | Australia   | 2012 | NA      |
| 113 | KF060102 | NSW811C     | Australia   | 2012 | NA      |
| 114 | KF060110 | NSW8482     | Australia   | 2012 | NA      |
| 115 | KF060111 | NSW862G     | Australia   | 2012 | NA      |
| 116 | KF060112 | NSW8632     | Australia   | 2012 | NA      |
| 117 | KF060113 | NSW868I     | Australia   | 2012 | NA      |
| 118 | KF060122 | NLV-10-603  | New Zealand | 2010 | NA      |
| 119 | KF060123 | NLV-10-614  | New Zealand | 2010 | NA      |
| 120 | KF060124 | NLV-10-640  | New Zealand | 2010 | NA      |
| 121 | KF060125 | NLV-12-1034 | New Zealand | 2012 | NA      |
| 122 | KF060126 | NLV-12-1056 | New Zealand | 2012 | NA      |
| 123 | KF060127 | NLV-12-1067 | New Zealand | 2012 | NA      |
| 124 | KF060128 | NLV-12-1072 | New Zealand | 2012 | NA      |
| 125 | KF060129 | NLV-12-308  | New Zealand | 2012 | NA      |
| 126 | KF060130 | NLV-12-494  | New Zealand | 2012 | NA      |
| 127 | KF060131 | NLV-12-501  | New Zealand | 2012 | NA      |
| 128 | KF060132 | NLV-12-514  | New Zealand | 2012 | NA      |
| 129 | KF060133 | NLV-12-548  | New Zealand | 2012 | NA      |
| 130 | KF060134 | NLV-12-583  | New Zealand | 2012 | NA      |
| 131 | KF060135 | NLV-12-607  | New Zealand | 2012 | NA      |
| 132 | KF060136 | NLV-12-615  | New Zealand | 2012 | NA      |
| 133 | KF060137 | NLV-12-628  | New Zealand | 2012 | NA      |
| 134 | KF060138 | NLV-12-65   | New Zealand | 2012 | NA      |
| 135 | KF060139 | NLV-12-671  | New Zealand | 2012 | NA      |
| 136 | KF060140 | NLV-12-672  | New Zealand | 2012 | NA      |
| 137 | KF060141 | NLV-12-719  | New Zealand | 2012 | NA      |
| 138 | KF060142 | NLV-12-723  | New Zealand | 2012 | NA      |
| 139 | KF060143 | NLV-12-73   | New Zealand | 2012 | NA      |
| 140 | KF060144 | NLV-12-734  | New Zealand | 2012 | NA      |
| 141 | KF060145 | NLV-12-758  | New Zealand | 2012 | NA      |
| 142 | KF060146 | NLV-12-763  | New Zealand | 2012 | NA      |
| 143 | KF060147 | NLV-12-787  | New Zealand | 2012 | NA      |
| 144 | KF060148 | NLV-12-803  | New Zealand | 2012 | NA      |
| 145 | KF060149 | NLV-12-809  | New Zealand | 2012 | NA      |
| 146 | KF060150 | NLV-12-831  | New Zealand | 2012 | NA      |
| 147 | KF060151 | NLV-12-902  | New Zealand | 2012 | NA      |
| 148 | KF060152 | NLV-12-932  | New Zealand | 2012 | NA      |
| 149 | KF060153 | NLV-12-934  | New Zealand | 2012 | NA      |
| 150 | KF145148 | JP10909     | Japan       | 2012 | GII.P31 |
| 151 | KF177429 | 35444252    | Australia   | 2012 | NA      |
| 152 | KF177430 | 30934022    | Australia   | 2012 | NA      |



|     |          |                  |              |      |         |
|-----|----------|------------------|--------------|------|---------|
| 153 | KF177431 | 93762261         | Australia    | 2012 | NA      |
| 154 | KF177432 | 21859972         | Australia    | 2013 | NA      |
| 155 | KF177433 | 21859964         | Australia    | 2012 | NA      |
| 156 | KF177434 | 21859969         | Australia    | 2013 | NA      |
| 157 | KF177435 | 21859973         | Australia    | 2013 | NA      |
| 158 | KF177436 | 21859977         | Australia    | 2013 | NA      |
| 159 | KF177437 | 21859978         | Australia    | 2013 | NA      |
| 160 | KF177438 | 21859980         | Australia    | 2013 | NA      |
| 161 | KF177439 | 33765031         | Australia    | 2012 | NA      |
| 162 | KF177440 | 32973745         | Australia    | 2012 | NA      |
| 163 | KF177441 | 34760731         | Australia    | 2012 | NA      |
| 164 | KF177442 | 30949403         | Australia    | 2012 | NA      |
| 165 | KF177443 | 35857786         | Australia    | 2012 | NA      |
| 166 | KF177444 | 36126758         | Australia    | 2013 | NA      |
| 167 | KF177445 | 36285194         | Australia    | 2012 | NA      |
| 168 | KF177446 | 90186710         | Australia    | 2012 | NA      |
| 169 | KF177447 | 30996947         | Australia    | 2012 | NA      |
| 170 | KF177448 | 35408489         | Australia    | 2012 | NA      |
| 171 | KF177449 | 11992339         | Australia    | 2012 | NA      |
| 172 | KF177450 | 34506158         | Australia    | 2012 | NA      |
| 173 | KF177451 | 34790954         | Australia    | 2013 | NA      |
| 174 | KF306214 | Jingzhou2013403  | China        | 2013 | GII.P31 |
| 175 | KF378731 | PA13             | Italy        | 2013 | GII.P4  |
| 176 | KF509946 | AlbertaEI063     | Canada       | 2012 | GII.P31 |
| 177 | KF509947 | AlbertaEI337     | Canada       | 2011 | GII.P4  |
| 178 | KF668567 | PA363            | Italy        | 2011 | GII.P31 |
| 179 | KF668568 | PA48             | Italy        | 2012 | GII.P31 |
| 180 | KF668569 | PA703            | Italy        | 2012 | GII.P31 |
| 181 | KF944259 | Nsk-N495         | Russia       | 2012 | GII.P31 |
| 182 | KJ196279 | Fukuyama3        | Japan        | 2012 | GII.P31 |
| 183 | KJ196280 | Fukuyama2        | Japan        | 2012 | GII.P31 |
| 184 | KJ196281 | Fukuyama5        | Japan        | 2012 | GII.P31 |
| 185 | KJ196283 | Taipei106        | Taiwan       | 2012 | GII.P31 |
| 186 | KJ196293 | Fukuyama1        | Japan        | 2012 | GII.P31 |
| 187 | KJ196296 | Taipei105        | Taiwan       | 2012 | GII.P31 |
| 188 | KJ433968 | 12-AS-1          | Taiwan       | 2013 | NA      |
| 189 | KJ433969 | 13-AV-1-6        | Taiwan       | 2013 | NA      |
| 190 | KJ433970 | 13-AV-1-10       | Taiwan       | 2013 | NA      |
| 191 | KJ451059 | 13-BE-4          | Taiwan       | 2013 | GII.P31 |
| 192 | KJ451060 | TCDC-case        | Taiwan       | 2013 | GII.P31 |
| 193 | KJ649701 | CUHK-NS-243      | Hong Kong    | 2014 | NA      |
| 194 | KJ649702 | CUHK-NS-244      | Hong Kong    | 2014 | NA      |
| 195 | KJ649703 | CUHK-NS-246      | Hong Kong    | 2014 | NA      |
| 196 | KJ649704 | CUHK-NS-250      | Hong Kong    | 2014 | NA      |
| 197 | KJ649705 | CUHK-NS-141      | Hong Kong    | 2013 | GII.P31 |
| 198 | KJ685402 | BG1C0434         | Bangladesh   | 2012 | GII.P4  |
| 199 | KJ685406 | BG1C0391         | Bangladesh   | 2012 | GII.P31 |
| 200 | KJ685411 | BG1C0398         | Bangladesh   | 2012 | GII.P4  |
| 201 | KJ685412 | BG1C0405         | Bangladesh   | 2012 | GII.P31 |
| 202 | KJ710247 | Johannesburg9814 | South Africa | 2012 | GII.P31 |
| 203 | KJ716354 | PKUPH-19         | China        | 2012 | NA      |
| 204 | KJ716355 | PKUPH-20         | China        | 2012 | NA      |

|     |          |             |           |      |         |
|-----|----------|-------------|-----------|------|---------|
| 205 | KJ716356 | PKUPH-37    | China     | 2012 | NA      |
| 206 | KJ716357 | PKUPH-39    | China     | 2012 | NA      |
| 207 | KJ716358 | PKUPH-40    | China     | 2012 | NA      |
| 208 | KJ716359 | PKUPH-64    | China     | 2012 | NA      |
| 209 | KJ716360 | PKUPH-78    | China     | 2012 | NA      |
| 210 | KJ716361 | PKUPH-97    | China     | 2012 | NA      |
| 211 | KJ716362 | PKUPH-117   | China     | 2013 | NA      |
| 212 | KJ716363 | PKUPH-118   | China     | 2013 | NA      |
| 213 | KJ716364 | PKUPH-124   | China     | 2013 | NA      |
| 214 | KJ716365 | PKUPH-129   | China     | 2013 | NA      |
| 215 | KJ716366 | PKUPH-140   | China     | 2013 | NA      |
| 216 | KJ716367 | PKUPH-159   | China     | 2013 | NA      |
| 217 | KJ716368 | PKUPH-160   | China     | 2013 | NA      |
| 218 | KJ716369 | PKUPH-63    | China     | 2012 | NA      |
| 219 | KJ955492 | JB031230054 | China     | 2012 | GII.P31 |
| 220 | KJ955493 | JB031230049 | China     | 2012 | GII.P31 |
| 221 | KM114291 | SJTUH1      | China     | 2014 | NA      |
| 222 | KM245075 | 13-Z-2      | Taiwan    | 2013 | GII.P31 |
| 223 | KM258128 | 12-BA-1     | Taiwan    | 2012 | GII.P31 |
| 224 | KM258129 | 12-CG-2-4   | Taiwan    | 2012 | GII.P31 |
| 225 | KM268075 | CUHK-NS-221 | Hong Kong | 2014 | NA      |
| 226 | KM268076 | CUHK-NS-223 | Hong Kong | 2014 | NA      |
| 227 | KM268077 | CUHK-NS-225 | Hong Kong | 2014 | NA      |
| 228 | KM268078 | CUHK-NS-226 | Hong Kong | 2014 | NA      |
| 229 | KM268079 | CUHK-NS-229 | Hong Kong | 2014 | NA      |
| 230 | KM268080 | CUHK-NS-235 | Hong Kong | 2014 | NA      |
| 231 | KM268081 | CUHK-NS-236 | Hong Kong | 2014 | NA      |
| 232 | KM268082 | CUHK-NS-237 | Hong Kong | 2014 | NA      |
| 233 | KM268083 | CUHK-NS-251 | Hong Kong | 2014 | NA      |
| 234 | KM268084 | CUHK-NS-264 | Hong Kong | 2014 | NA      |
| 235 | KM268085 | CUHK-NS-269 | Hong Kong | 2014 | NA      |
| 236 | KM268086 | CUHK-NS-270 | Hong Kong | 2014 | NA      |
| 237 | KM268087 | CUHK-NS-271 | Hong Kong | 2014 | NA      |
| 238 | KM268088 | CUHK-NS-273 | Hong Kong | 2014 | NA      |
| 239 | KM268089 | CUHK-NS-278 | Hong Kong | 2014 | NA      |
| 240 | KM268090 | CUHK-NS-279 | Hong Kong | 2014 | NA      |
| 241 | KM268091 | CUHK-NS-280 | Hong Kong | 2014 | NA      |
| 242 | KM268092 | CUHK-NS-281 | Hong Kong | 2014 | NA      |
| 243 | KM268093 | CUHK-NS-285 | Hong Kong | 2014 | NA      |
| 244 | KM268094 | CUHK-NS-288 | Hong Kong | 2014 | NA      |
| 245 | KM268095 | CUHK-NS-289 | Hong Kong | 2014 | NA      |
| 246 | KM268096 | CUHK-NS-292 | Hong Kong | 2014 | NA      |
| 247 | KM268097 | CUHK-NS-295 | Hong Kong | 2014 | NA      |
| 248 | KM268098 | CUHK-NS-296 | Hong Kong | 2014 | NA      |
| 249 | KM268099 | CUHK-NS-297 | Hong Kong | 2014 | NA      |
| 250 | KM268100 | CUHK-NS-298 | Hong Kong | 2014 | NA      |
| 251 | KM268101 | CUHK-NS-299 | Hong Kong | 2014 | NA      |
| 252 | KM268102 | CUHK-NS-302 | Hong Kong | 2014 | NA      |
| 253 | KM268103 | CUHK-NS-303 | Hong Kong | 2014 | NA      |
| 254 | KM268104 | CUHK-NS-304 | Hong Kong | 2014 | NA      |
| 255 | KM268105 | CUHK-NS-306 | Hong Kong | 2014 | NA      |
| 256 | KM268106 | CUHK-NS-307 | Hong Kong | 2014 | NA      |

|     |          |                  |             |      |         |
|-----|----------|------------------|-------------|------|---------|
| 257 | KM268107 | CUHK-NS-309      | Hong Kong   | 2014 | NA      |
| 258 | KM272334 | gg-12-08-04      | South Korea | 2012 | GII.P31 |
| 259 | KM396961 | CUHK-NS-339      | Hong Kong   | 2014 | NA      |
| 260 | KM406485 | E10082_La_Fleche | France      | 2013 | NA      |
| 261 | KM514057 | CUHK-NS-311      | Hong Kong   | 2014 | NA      |
| 262 | KM514058 | CUHK-NS-312      | Hong Kong   | 2014 | NA      |
| 263 | KM514059 | CUHK-NS-313      | Hong Kong   | 2014 | NA      |
| 264 | KM514060 | CUHK-NS-315      | Hong Kong   | 2014 | NA      |
| 265 | KM514061 | CUHK-NS-316      | Hong Kong   | 2014 | NA      |
| 266 | KM514062 | CUHK-NS-317      | Hong Kong   | 2014 | NA      |
| 267 | KM514063 | CUHK-NS-318      | Hong Kong   | 2014 | NA      |
| 268 | KM514064 | CUHK-NS-319      | Hong Kong   | 2014 | NA      |
| 269 | KM514065 | CUHK-NS-320      | Hong Kong   | 2014 | NA      |
| 270 | KM514066 | CUHK-NS-321      | Hong Kong   | 2014 | NA      |
| 271 | KM514067 | CUHK-NS-322      | Hong Kong   | 2014 | NA      |
| 272 | KM514068 | CUHK-NS-323      | Hong Kong   | 2014 | NA      |
| 273 | KM514069 | CUHK-NS-324      | Hong Kong   | 2014 | NA      |
| 274 | KM514070 | CUHK-NS-327      | Hong Kong   | 2014 | NA      |
| 275 | KM514071 | CUHK-NS-328      | Hong Kong   | 2014 | NA      |
| 276 | KM514072 | CUHK-NS-329      | Hong Kong   | 2014 | NA      |
| 277 | KM514073 | CUHK-NS-330      | Hong Kong   | 2014 | NA      |
| 278 | KM514074 | CUHK-NS-331      | Hong Kong   | 2014 | NA      |
| 279 | KM514075 | CUHK-NS-332      | Hong Kong   | 2014 | NA      |
| 280 | KM514076 | CUHK-NS-333      | Hong Kong   | 2014 | NA      |
| 281 | KM514077 | CUHK-NS-334      | Hong Kong   | 2014 | NA      |
| 282 | KM514078 | CUHK-NS-335      | Hong Kong   | 2014 | NA      |
| 283 | KM514079 | CUHK-NS-336      | Hong Kong   | 2014 | NA      |
| 284 | KM982935 | CUHK-NS-337      | Hong Kong   | 2014 | NA      |
| 285 | KM982936 | CUHK-NS-340      | Hong Kong   | 2014 | NA      |
| 286 | KM982937 | CUHK-NS-342      | Hong Kong   | 2014 | NA      |
| 287 | KM982938 | CUHK-NS-345      | Hong Kong   | 2014 | NA      |
| 288 | KM982939 | CUHK-NS-347      | Hong Kong   | 2014 | NA      |
| 289 | KM982940 | CUHK-NS-348      | Hong Kong   | 2014 | NA      |
| 290 | KM982941 | CUHK-NS-349      | Hong Kong   | 2014 | NA      |
| 291 | KM982942 | CUHK-NS-350      | Hong Kong   | 2014 | NA      |
| 292 | KM982943 | CUHK-NS-351      | Hong Kong   | 2014 | NA      |
| 293 | KM982944 | CUHK-NS-354      | Hong Kong   | 2014 | NA      |
| 294 | KM982945 | CUHK-NS-355      | Hong Kong   | 2014 | NA      |
| 295 | KM982946 | CUHK-NS-357      | Hong Kong   | 2014 | NA      |
| 296 | KM982947 | CUHK-NS-358      | Hong Kong   | 2014 | NA      |
| 297 | KM982948 | CUHK-NS-359      | Hong Kong   | 2014 | NA      |
| 298 | KM982949 | CUHK-NS-361      | Hong Kong   | 2014 | NA      |
| 299 | KM982950 | CUHK-NS-362      | Hong Kong   | 2014 | NA      |
| 300 | KM982951 | CUHK-NS-363      | Hong Kong   | 2014 | NA      |
| 301 | KM982952 | CUHK-NS-364      | Hong Kong   | 2014 | NA      |
| 302 | KM982953 | CUHK-NS-365      | Hong Kong   | 2014 | NA      |
| 303 | KM982954 | CUHK-NS-367      | Hong Kong   | 2014 | NA      |
| 304 | KM982955 | CUHK-NS-369      | Hong Kong   | 2014 | NA      |
| 305 | KM982956 | CUHK-NS-370      | Hong Kong   | 2014 | NA      |
| 306 | KP096327 | CUHK-NS-368      | Hong Kong   | 2014 | NA      |
| 307 | KP096328 | CUHK-NS-372      | Hong Kong   | 2014 | NA      |
| 308 | KP096329 | CUHK-NS-374      | Hong Kong   | 2014 | NA      |

|     |          |             |           |      |    |
|-----|----------|-------------|-----------|------|----|
| 309 | KP096330 | CUHK-NS-377 | Hong Kong | 2014 | NA |
| 310 | KP096331 | CUHK-NS-378 | Hong Kong | 2014 | NA |
| 311 | KP096332 | CUHK-NS-380 | Hong Kong | 2014 | NA |
| 312 | KP096334 | CUHK-NS-384 | Hong Kong | 2014 | NA |
| 313 | KP096335 | CUHK-NS-385 | Hong Kong | 2014 | NA |
| 314 | KP096336 | CUHK-NS-386 | Hong Kong | 2014 | NA |
| 315 | KP096337 | CUHK-NS-387 | Hong Kong | 2014 | NA |
| 316 | KP096338 | CUHK-NS-389 | Hong Kong | 2014 | NA |
| 317 | KP096339 | CUHK-NS-393 | Hong Kong | 2014 | NA |
| 318 | KP096340 | CUHK-NS-394 | Hong Kong | 2014 | NA |
| 319 | KP096341 | CUHK-NS-395 | Hong Kong | 2014 | NA |
| 320 | KP096342 | CUHK-NS-396 | Hong Kong | 2014 | NA |
| 321 | KP096343 | CUHK-NS-397 | Hong Kong | 2014 | NA |
| 322 | KP096344 | CUHK-NS-398 | Hong Kong | 2014 | NA |
| 323 | KP096345 | CUHK-NS-399 | Hong Kong | 2014 | NA |
| 324 | KP096346 | CUHK-NS-402 | Hong Kong | 2014 | NA |
| 325 | KP096348 | CUHK-NS-406 | Hong Kong | 2014 | NA |
| 326 | KP123606 | CUHK-NS-426 | Hong Kong | 2014 | NA |
| 327 | KP176393 | CUHK-NS-341 | Hong Kong | 2014 | NA |
| 328 | KP176394 | CUHK-NS-346 | Hong Kong | 2014 | NA |
| 329 | KP176395 | CUHK-NS-352 | Hong Kong | 2014 | NA |
| 330 | KP176396 | CUHK-NS-356 | Hong Kong | 2014 | NA |
| 331 | KP176397 | CUHK-NS-371 | Hong Kong | 2014 | NA |
| 332 | KP176398 | CUHK-NS-376 | Hong Kong | 2014 | NA |
| 333 | KP176399 | CUHK-NS-379 | Hong Kong | 2014 | NA |
| 334 | KP176400 | CUHK-NS-407 | Hong Kong | 2014 | NA |
| 335 | KP176401 | CUHK-NS-412 | Hong Kong | 2014 | NA |
| 336 | KP176402 | CUHK-NS-415 | Hong Kong | 2014 | NA |
| 337 | KP176403 | CUHK-NS-416 | Hong Kong | 2014 | NA |
| 338 | KP176404 | CUHK-NS-417 | Hong Kong | 2014 | NA |
| 339 | KP176405 | CUHK-NS-418 | Hong Kong | 2014 | NA |
| 340 | KP176406 | CUHK-NS-420 | Hong Kong | 2014 | NA |
| 341 | KP176407 | CUHK-NS-421 | Hong Kong | 2014 | NA |
| 342 | KP176408 | CUHK-NS-429 | Hong Kong | 2014 | NA |
| 343 | KP176409 | CUHK-NS-430 | Hong Kong | 2014 | NA |
| 344 | KP176410 | CUHK-NS-431 | Hong Kong | 2014 | NA |
| 345 | KP176411 | CUHK-NS-433 | Hong Kong | 2014 | NA |
| 346 | KP176412 | CUHK-NS-435 | Hong Kong | 2014 | NA |
| 347 | KP241905 | CUHK-NS-436 | Hong Kong | 2014 | NA |
| 348 | KP241906 | CUHK-NS-437 | Hong Kong | 2014 | NA |
| 349 | KP241907 | CUHK-NS-439 | Hong Kong | 2014 | NA |
| 350 | KP241908 | CUHK-NS-440 | Hong Kong | 2014 | NA |
| 351 | KP241909 | CUHK-NS-443 | Hong Kong | 2014 | NA |
| 352 | KP241910 | CUHK-NS-444 | Hong Kong | 2014 | NA |
| 353 | KP241911 | CUHK-NS-445 | Hong Kong | 2014 | NA |
| 354 | KP241912 | CUHK-NS-448 | Hong Kong | 2014 | NA |
| 355 | KP241913 | CUHK-NS-451 | Hong Kong | 2014 | NA |
| 356 | KP241914 | CUHK-NS-453 | Hong Kong | 2014 | NA |
| 357 | KP241915 | CUHK-NS-454 | Hong Kong | 2014 | NA |
| 358 | KP293587 | CUHK-NS-457 | Hong Kong | 2014 | NA |
| 359 | KP293588 | CUHK-NS-458 | Hong Kong | 2014 | NA |
| 360 | KP293589 | CUHK-NS-461 | Hong Kong | 2014 | NA |

|     |          |                        |              |      |         |
|-----|----------|------------------------|--------------|------|---------|
| 361 | KP293590 | CUHK-NS-462            | Hong Kong    | 2014 | NA      |
| 362 | KP293591 | CUHK-NS-464            | Hong Kong    | 2014 | NA      |
| 363 | KP698923 | CUHK-NS-474            | Hong Kong    | 2014 | NA      |
| 364 | KP698924 | CUHK-NS-485            | Hong Kong    | 2014 | NA      |
| 365 | KP698925 | CUHK-NS-489            | Hong Kong    | 2014 | NA      |
| 366 | KP698926 | CUHK-NS-490            | Hong Kong    | 2014 | NA      |
| 367 | KP698927 | CUHK-NS-505            | Hong Kong    | 2014 | NA      |
| 368 | KP784694 | Empangeni_8604         | South Africa | 2012 | GII.P4  |
| 369 | KP784696 | CapeTown_9772          | South Africa | 2012 | GII.P31 |
| 370 | KP784697 | CapeTown_10105         | South Africa | 2012 | GII.P31 |
| 371 | KP864105 | 142696                 | China        | 2014 | NA      |
| 372 | KP864106 | 142681                 | China        | 2014 | NA      |
| 373 | KP864107 | 152624                 | China        | 2015 | NA      |
| 374 | KR131783 | Pune-131742            | India        | 2013 | NA      |
| 375 | KR131784 | Pune-136935            | India        | 2013 | NA      |
| 376 | KR131785 | Pune-1324318           | India        | 2013 | NA      |
| 377 | KR904214 | Johannesburg_5520      | South Africa | 2010 | NA      |
| 378 | KR904215 | Johannesburg_5935      | South Africa | 2010 | NA      |
| 379 | KR904221 | Empangeni_11939        | South Africa | 2013 | NA      |
| 380 | KR904222 | Johannesburg_12065     | South Africa | 2013 | NA      |
| 381 | KR904223 | Johannesburg_12163     | South Africa | 2013 | NA      |
| 382 | KR904224 | Pietermaritzburg_12226 | South Africa | 2013 | NA      |
| 383 | KR904226 | Johannesburg_12233     | South Africa | 2013 | NA      |
| 384 | KR904227 | Johannesburg_12256     | South Africa | 2013 | NA      |
| 385 | KR904228 | Johannesburg_12369     | South Africa | 2013 | NA      |
| 386 | KR904236 | Johannesburg_8429      | South Africa | 2011 | NA      |
| 387 | KR904237 | Empangeni_8598         | South Africa | 2012 | NA      |
| 388 | KR904238 | Cape_Town_10917        | South Africa | 2013 | GII.P31 |
| 389 | KT202793 | GZ2013-L10             | China        | 2014 | GII.P31 |
| 390 | KT202794 | GZ2014-L106            | China        | 2014 | GII.P31 |
| 391 | KT202795 | GZ2014-L122            | China        | 2014 | GII.P31 |
| 392 | KT202796 | GZ2014-L132            | China        | 2014 | GII.P31 |
| 393 | KT202797 | GZ2014-L295            | China        | 2014 | GII.P31 |
| 394 | KT202798 | GZ2014-L307            | China        | 2014 | GII.P31 |
| 395 | KT780371 | CUHK-NS-508            | Hong Kong    | 2015 | NA      |
| 396 | KT780372 | CUHK-NS-515            | Hong Kong    | 2015 | NA      |
| 397 | KT780373 | CUHK-NS-516            | Hong Kong    | 2015 | NA      |
| 398 | KT780374 | CUHK-NS-524            | Hong Kong    | 2015 | NA      |
| 399 | KT780375 | CUHK-NS-525            | Hong Kong    | 2015 | NA      |
| 400 | KT780376 | CUHK-NS-526            | Hong Kong    | 2015 | NA      |
| 401 | KT780377 | CUHK-NS-529            | Hong Kong    | 2015 | NA      |
| 402 | KT780378 | CUHK-NS-530            | Hong Kong    | 2015 | NA      |
| 403 | KT780379 | CUHK-NS-542            | Hong Kong    | 2015 | NA      |
| 404 | KT780380 | CUHK-NS-544            | Hong Kong    | 2015 | NA      |
| 405 | KT780381 | CUHK-NS-554            | Hong Kong    | 2015 | NA      |
| 406 | KT780382 | CUHK-NS-555            | Hong Kong    | 2015 | NA      |
| 407 | KT780383 | CUHK-NS-559            | Hong Kong    | 2015 | NA      |
| 408 | KT780384 | CUHK-NS-566            | Hong Kong    | 2015 | NA      |
| 409 | KT780385 | CUHK-NS-572            | Hong Kong    | 2015 | NA      |
| 410 | KT780386 | CUHK-NS-584            | Hong Kong    | 2015 | NA      |
| 411 | KT780387 | CUHK-NS-598            | Hong Kong    | 2015 | NA      |
| 412 | KT780388 | CUHK-NS-618            | Hong Kong    | 2015 | NA      |

|     |          |                          |               |      |         |
|-----|----------|--------------------------|---------------|------|---------|
| 413 | KT780389 | CUHK-NS-651              | Hong Kong     | 2015 | NA      |
| 414 | KT780390 | CUHK-NS-652              | Hong Kong     | 2015 | NA      |
| 415 | KT780391 | CUHK-NS-660              | Hong Kong     | 2015 | NA      |
| 416 | KT780392 | CUHK-NS-661              | Hong Kong     | 2015 | NA      |
| 417 | KT780393 | CUHK-NS-663              | Hong Kong     | 2015 | NA      |
| 418 | KU311158 | OU2                      | Canada        | 2014 | GII.P31 |
| 419 | KU678201 | 15-IB-2                  | Taiwan        | 2015 | GII.P31 |
| 420 | KU678202 | 15-IZ-1                  | Taiwan        | 2015 | GII.P31 |
| 421 | KU678203 | 15-JO-2                  | Taiwan        | 2016 | GII.P31 |
| 422 | KU678204 | 16-C-2                   | Taiwan        | 2016 | GII.P31 |
| 423 | KU678205 | 16-J-1                   | Taiwan        | 2016 | GII.P31 |
| 424 | KU683739 | Lishui02                 | China         | 2015 | NA      |
| 425 | KU985152 | 14-Mar                   | Germany       | 2014 | NA      |
| 426 | KU985153 | 14-Apr                   | Germany       | 2014 | NA      |
| 427 | KU985154 | 14-Aug                   | Germany       | 2014 | NA      |
| 428 | KU985155 | 13-14                    | Germany       | 2014 | NA      |
| 429 | KU985156 | 19-14                    | Germany       | 2014 | NA      |
| 430 | KU985157 | 28-14                    | Germany       | 2014 | NA      |
| 431 | KU985159 | 34-14                    | Germany       | 2014 | NA      |
| 432 | KU985160 | 36-14                    | Germany       | 2014 | NA      |
| 433 | KU985161 | 42-14                    | Germany       | 2014 | NA      |
| 434 | KU985162 | 43-14                    | Germany       | 2014 | NA      |
| 435 | KU985164 | 56-14                    | Germany       | 2014 | NA      |
| 436 | KX158279 | 13-38                    | Canada        | 2015 | GII.P31 |
| 437 | KX158280 | 13-39                    | Canada        | 2015 | GII.P31 |
| 438 | KX158283 | 15-58                    | Canada        | 2015 | GII.P31 |
| 439 | KX158285 | 15-59                    | Canada        | 2015 | GII.P31 |
| 440 | KX354004 | 2012-SP-0607_083012_CS   | United States | 2012 | NA      |
| 441 | KX354005 | 2012-SP-0616_082512_CS   | United States | 2012 | NA      |
| 442 | KX354006 | 2012-SP-0670_092712_IL   | United States | 2012 | NA      |
| 443 | KX354007 | 2012-SP-0671_092712_IL   | United States | 2012 | NA      |
| 444 | KX354008 | 2012-SP-0672_092712_IL   | United States | 2012 | NA      |
| 445 | KX354009 | 2012-SP-0713_100912_WI   | United States | 2012 | NA      |
| 446 | KX354010 | 2012-SP-0716_010612_MN   | United States | 2012 | NA      |
| 447 | KX354012 | 2012-SP-0724_092612_MN   | United States | 2012 | NA      |
| 448 | KX354014 | 2012-SP-0820_112712_CS   | United States | 2012 | NA      |
| 449 | KX354015 | 2012-SP-0821_112712_CS   | United States | 2012 | NA      |
| 450 | KX354017 | 2012-SP-0566_103112_TX   | United States | 2012 | NA      |
| 451 | KX354018 | 2012-SP-0599_110112_TX   | United States | 2012 | NA      |
| 452 | KX354019 | 2012-SP-0601_110112_TX   | United States | 2012 | NA      |
| 453 | KX354020 | 2012-SP-0602_111412_TX   | United States | 2012 | NA      |
| 454 | KX354021 | 2012-SP-0899_111812_TX   | United States | 2012 | NA      |
| 455 | KX354022 | 2012-SP-0905_111112_TN   | United States | 2012 | NA      |
| 456 | KX354023 | 2012-SP-0907_111612_TN   | United States | 2012 | NA      |
| 457 | KX354024 | 2012-SP-0910_112812_TN   | United States | 2012 | NA      |
| 458 | KX354025 | 2012-SP-0911_112012_WIMW | United States | 2012 | NA      |
| 459 | KX354027 | 2012-SP-0731_102212_CS   | United States | 2012 | NA      |
| 460 | KX354028 | 2012-SP-0952_122112_CS   | United States | 2012 | NA      |
| 461 | KX354029 | 2012-SP-0956_122412_CS   | United States | 2012 | NA      |
| 462 | KX354030 | 2013-SP-0029_012213_AL   | United States | 2013 | NA      |
| 463 | KX354031 | 2013-SP-0030_012113_AL   | United States | 2013 | NA      |
| 464 | KX354032 | 2013-SP-0032_102612_AR   | United States | 2012 | NA      |

|     |          |                         |               |      |    |
|-----|----------|-------------------------|---------------|------|----|
| 465 | KX354033 | 2013-SP-0036_010913_HI  | United States | 2013 | NA |
| 466 | KX354034 | 2013-SP-0037_020212_MD  | United States | 2012 | NA |
| 467 | KX354039 | 2013-SP-0045_070712_NY  | United States | 2012 | NA |
| 468 | KX354040 | 2013-SP-0046_070612_NY  | United States | 2012 | NA |
| 469 | KX354042 | 2013-SP-0050_010412_TN  | United States | 2012 | NA |
| 470 | KX354043 | 2013-SP-0052_111512_TN  | United States | 2012 | NA |
| 471 | KX354044 | 2013-SP-0054_110812_TN  | United States | 2012 | NA |
| 472 | KX354045 | 2013-SP-0055_110812_TN  | United States | 2012 | NA |
| 473 | KX354046 | 2013-SP-0056_011713_TN  | United States | 2013 | NA |
| 474 | KX354047 | 2013-SP-0057_011513_TN  | United States | 2013 | NA |
| 475 | KX354048 | 2013-SP-0060_012913_TN  | United States | 2013 | NA |
| 476 | KX354049 | 2013-SP-0061_011412_VA  | United States | 2012 | NA |
| 477 | KX354050 | 2013-SP-0062_011612_VA  | United States | 2012 | NA |
| 478 | KX354055 | 2013-SP-0068_120512_WI  | United States | 2012 | NA |
| 479 | KX354056 | 2013-SP-0069_120412_WI  | United States | 2012 | NA |
| 480 | KX354057 | 2013-SP-0070_102611_ME  | United States | 2011 | NA |
| 481 | KX354058 | 2013-SP-0071_123112_ME  | United States | 2012 | NA |
| 482 | KX354063 | 2013-SP-0178_031013_CS  | United States | 2013 | NA |
| 483 | KX354064 | 2013-SP-0179_031013_CS  | United States | 2013 | NA |
| 484 | KX354065 | 2013-SP-0246_042013_IL  | United States | 2013 | NA |
| 485 | KX354066 | 2013-SP-0247_041913_IL  | United States | 2013 | NA |
| 486 | KX354067 | 2013-SP-0251_021513_GA  | United States | 2013 | NA |
| 487 | KX354068 | 2013-SP-0252_021513_GA  | United States | 2013 | NA |
| 488 | KX354069 | 2013-SP-0309_050613_CS  | United States | 2013 | NA |
| 489 | KX354070 | 2013-SP-0310_050613_CS  | United States | 2013 | NA |
| 490 | KX354094 | 2014-SP-0352_110715_LAC | United States | 2013 | NA |
| 491 | KX354095 | 2014-SP-0355_121513_LAC | United States | 2013 | NA |
| 492 | KX354096 | 2014-SP-0356_050914_LAC | United States | 2014 | NA |
| 493 | KX354097 | 2014-SP-0357_051014_LAC | United States | 2014 | NA |
| 494 | KX354098 | 2014-SP-0366_111313_OH  | United States | 2013 | NA |
| 495 | KX354099 | 2014-SP-0367_111313_OH  | United States | 2013 | NA |
| 496 | KX354100 | 2014-SP-0370_031014_OH  | United States | 2014 | NA |
| 497 | KX354101 | 2014-SP-0373_051314_OH  | United States | 2014 | NA |
| 498 | KX354102 | 2014-SP-0377_072014_OH  | United States | 2014 | NA |
| 499 | KX354103 | 2014-SP-0378_072214_OH  | United States | 2014 | NA |
| 500 | KX354104 | 2014-SP-0380_102013_OR  | United States | 2013 | NA |
| 501 | KX354105 | 2014-SP-0381_121013_OR  | United States | 2013 | NA |
| 502 | KX354106 | 2014-SP-0383_010614_OR  | United States | 2014 | NA |
| 503 | KX354107 | 2014-SP-0384_010714_OR  | United States | 2014 | NA |
| 504 | KX354108 | 2014-SP-0385_021514_OR  | United States | 2014 | NA |
| 505 | KX354109 | 2014-SP-0386_021314_OR  | United States | 2014 | NA |
| 506 | KX354110 | 2014-SP-0390_042514_OR  | United States | 2014 | NA |
| 507 | KX354111 | 2014-SP-0401_112513_WI  | United States | 2013 | NA |
| 508 | KX354112 | 2014-SP-0402_112513_WI  | United States | 2013 | NA |
| 509 | KX354113 | 2014-SP-0418_081214_WI  | United States | 2014 | NA |
| 510 | KX354114 | 2015-SP-0022_021515_CA  | United States | 2015 | NA |
| 511 | KX354115 | 2015-SP-0060_021515_CA  | United States | 2015 | NA |
| 512 | KX354116 | 2015-SP-0061_022615_CA  | United States | 2015 | NA |
| 513 | KX354117 | 2015-SP-0062_030315_CA  | United States | 2015 | NA |
| 514 | KX354118 | 2015-SP-0074_030315_WI  | United States | 2015 | NA |
| 515 | KX354119 | 2015-SP-0075_030315_WI  | United States | 2015 | NA |
| 516 | KX354120 | 2015-SP-0065_031815_OH  | United States | 2015 | NA |

|     |          |                         |               |      |         |
|-----|----------|-------------------------|---------------|------|---------|
| 517 | KX354121 | 2015-SP-0066_031815_OH  | United States | 2015 | NA      |
| 518 | KX354122 | 2015-SP-0063_030715_MI  | United States | 2015 | NA      |
| 519 | KX354123 | 2015-SP-0064_030515_MI  | United States | 2015 | NA      |
| 520 | KX354124 | 2015-SP-0069_012715_VT  | United States | 2015 | NA      |
| 521 | KX354125 | 2015-SP-0070_012615_VT  | United States | 2015 | NA      |
| 522 | KX354126 | 2015-SP-0071_012615_VT  | United States | 2015 | NA      |
| 523 | KX354129 | 2015-SP-0067_020915_VA  | United States | 2015 | NA      |
| 524 | KX354130 | 2015-SP-0068_020615_VA  | United States | 2015 | NA      |
| 525 | KX354131 | 2015-SP-0248_112014_WI  | United States | 2014 | NA      |
| 526 | KX354132 | 2015-SP-0249_112014_WI  | United States | 2014 | NA      |
| 527 | KX354133 | 2015-SP-0250_121614_WI  | United States | 2014 | NA      |
| 528 | KX354134 | 2015-SP-0251_121714_WI  | United States | 2014 | NA      |
| 529 | KX354135 | 2015-SP-0253_031815_WI  | United States | 2015 | NA      |
| 530 | KX354136 | 2015-SP-0268_011215_FL  | United States | 2015 | NA      |
| 531 | KX354137 | 2015-SP-0269_011315_FL  | United States | 2015 | NA      |
| 532 | KX354138 | 2015-SP-0272_100115_CA  | United States | 2015 | NA      |
| 533 | KX354140 | 2015-SP-0399_122815_OR  | United States | 2015 | NA      |
| 534 | KX354141 | 2015-SP-0389_121215_MD  | United States | 2015 | NA      |
| 535 | KX354142 | 2015-SP-0390_121715_MD  | United States | 2015 | NA      |
| 536 | KX354143 | 2015-SP-0378_121415_CA  | United States | 2015 | NA      |
| 537 | KX354144 | 2015-SP-0379_121415_CA  | United States | 2015 | NA      |
| 538 | KX354145 | 2015-SP-0382_120515_IN  | United States | 2015 | NA      |
| 539 | KX354146 | 2015-SP-0385_111315_LAC | United States | 2015 | NA      |
| 540 | KX371605 | 2013-SP-0183_031313_CS  | United States | 2013 | NA      |
| 541 | KX371607 | 2013-SP-0450_051812_OR  | United States | 2012 | NA      |
| 542 | KX371610 | 2013-SP-0479_091613_CS  | United States | 2013 | NA      |
| 543 | KX586330 | ZJ01                    | China         | 2015 | GII.P31 |
| 544 | KX657722 | 16-BG-1                 | Taiwan        | 2016 | GII.P31 |
| 545 | KX657723 | 16-BH-1                 | Taiwan        | 2016 | GII.P31 |
| 546 | KX657724 | 16-BL-1                 | Taiwan        | 2016 | GII.P31 |
| 547 | KX657725 | 16-BN-2                 | Taiwan        | 2016 | GII.P31 |
| 548 | KX657726 | 16-BP-1                 | Taiwan        | 2016 | GII.P31 |
| 549 | KX657727 | 16-BQ-1                 | Taiwan        | 2016 | GII.P31 |
| 550 | KX657728 | 16-CK-1                 | Taiwan        | 2016 | GII.P31 |
| 551 | KX657729 | 16-CL-1                 | Taiwan        | 2016 | GII.P31 |
| 552 | KX657730 | 16-DW-1                 | Taiwan        | 2016 | GII.P31 |
| 553 | KX657731 | 16-FN-1                 | Taiwan        | 2016 | GII.P31 |
| 554 | KX657732 | D017                    | Taiwan        | 2016 | GII.P31 |
| 555 | KX657733 | C013                    | Taiwan        | 2016 | GII.P31 |
| 556 | KX657735 | D003                    | Taiwan        | 2016 | GII.P31 |
| 557 | KX657736 | D015                    | Taiwan        | 2016 | GII.P31 |
| 558 | KX657737 | D031                    | Taiwan        | 2016 | GII.P31 |
| 559 | KX767083 | Melbourne6623           | Australia     | 2016 | NA      |
| 560 | KX907727 | CA3477                  | United States | 2015 | GII.P16 |
| 561 | KX950760 | CUHK-NS-1064            | Hong Kong     | 2016 | NA      |
| 562 | KX989469 | 016C01                  | China         | 2016 | NA      |
| 563 | KX989470 | 016C02                  | China         | 2016 | NA      |
| 564 | KX989471 | 016C03                  | China         | 2016 | NA      |
| 565 | KX989472 | 016C04                  | China         | 2016 | NA      |
| 566 | KX989473 | 016C05                  | China         | 2016 | NA      |
| 567 | KY210971 | NS16-A119               | Russia        | 2016 | GII.P31 |
| 568 | KY210977 | NS16-C13                | Russia        | 2016 | GII.P31 |



|     |          |          |         |      |         |
|-----|----------|----------|---------|------|---------|
| 569 | KY210980 | NS16-C38 | Russia  | 2016 | GII.P16 |
| 570 | KY341923 | 13164    | Hungary | 2015 | GII.P31 |
| 571 | KY406987 | JC021    | China   | 2015 | NA      |
| 572 | KY406988 | JC022    | China   | 2015 | NA      |
| 573 | KY406989 | JC023    | China   | 2015 | NA      |
| 574 | KY406990 | JC024    | China   | 2015 | NA      |
| 575 | KY406991 | JC025    | China   | 2015 | NA      |
| 576 | KY406992 | JC026    | China   | 2015 | NA      |
| 577 | KY406993 | JC027    | China   | 2015 | NA      |
| 578 | KY406994 | JC028    | China   | 2015 | NA      |
| 579 | KY406995 | JC030    | China   | 2015 | NA      |
| 580 | KY406996 | JC034    | China   | 2015 | NA      |
| 581 | KY406997 | JC042    | China   | 2015 | NA      |
| 582 | KY406998 | JC049    | China   | 2015 | NA      |
| 583 | KY406999 | JC035    | China   | 2015 | NA      |
| 584 | KY407000 | JC029    | China   | 2015 | NA      |
| 585 | KY407001 | JC033    | China   | 2015 | NA      |
| 586 | KY407002 | JC036    | China   | 2015 | NA      |
| 587 | KY407003 | JC037    | China   | 2015 | NA      |
| 588 | KY407004 | JC040    | China   | 2015 | NA      |
| 589 | KY407005 | JC043    | China   | 2015 | NA      |
| 590 | KY407006 | JC044    | China   | 2015 | NA      |
| 591 | KY407007 | JC045    | China   | 2015 | NA      |
| 592 | KY407008 | JC047    | China   | 2015 | NA      |
| 593 | KY407009 | JC048    | China   | 2015 | NA      |
| 594 | KY407010 | JC053    | China   | 2015 | NA      |
| 595 | KY407011 | JC054    | China   | 2015 | NA      |
| 596 | KY407012 | JC055    | China   | 2015 | NA      |
| 597 | KY407013 | JC056    | China   | 2015 | NA      |
| 598 | KY407014 | JC057    | China   | 2015 | NA      |
| 599 | KY407015 | JC058    | China   | 2015 | NA      |
| 600 | KY407016 | JC059    | China   | 2015 | NA      |
| 601 | KY407017 | JC060    | China   | 2015 | NA      |
| 602 | KY407018 | JC061    | China   | 2015 | NA      |
| 603 | KY407019 | JC062    | China   | 2015 | NA      |
| 604 | KY407020 | JC063    | China   | 2015 | NA      |
| 605 | KY407021 | JC064    | China   | 2015 | NA      |
| 606 | KY407022 | JC065    | China   | 2015 | NA      |
| 607 | KY407023 | JC067    | China   | 2015 | NA      |
| 608 | KY407024 | JC069    | China   | 2015 | NA      |
| 609 | KY407025 | JC070    | China   | 2015 | NA      |
| 610 | KY407026 | JC071    | China   | 2015 | NA      |
| 611 | KY407027 | JC072    | China   | 2015 | NA      |
| 612 | KY407028 | JC074    | China   | 2015 | NA      |
| 613 | KY407029 | JC075    | China   | 2015 | NA      |
| 614 | KY407030 | JC076    | China   | 2015 | NA      |
| 615 | KY407031 | JC077    | China   | 2015 | NA      |
| 616 | KY407032 | JC078    | China   | 2015 | NA      |
| 617 | KY407033 | JC079    | China   | 2015 | NA      |
| 618 | KY407034 | JC080    | China   | 2015 | NA      |
| 619 | KY407035 | JC081    | China   | 2015 | NA      |
| 620 | KY407036 | JC082    | China   | 2015 | NA      |

|     |          |       |       |      |    |
|-----|----------|-------|-------|------|----|
| 621 | KY407037 | JC083 | China | 2015 | NA |
| 622 | KY407038 | JC085 | China | 2015 | NA |
| 623 | KY407039 | JC086 | China | 2015 | NA |
| 624 | KY407040 | JC087 | China | 2015 | NA |
| 625 | KY407041 | JC088 | China | 2015 | NA |
| 626 | KY407042 | JC089 | China | 2015 | NA |
| 627 | KY407043 | JC090 | China | 2015 | NA |
| 628 | KY407044 | JC091 | China | 2015 | NA |
| 629 | KY407045 | JC093 | China | 2015 | NA |
| 630 | KY407046 | JC094 | China | 2015 | NA |
| 631 | KY407047 | JC096 | China | 2015 | NA |
| 632 | KY407048 | JC098 | China | 2015 | NA |
| 633 | KY407049 | JC100 | China | 2015 | NA |
| 634 | KY407050 | JC102 | China | 2015 | NA |
| 635 | KY407051 | JC110 | China | 2015 | NA |
| 636 | KY407052 | JC112 | China | 2015 | NA |
| 637 | KY407053 | JC106 | China | 2015 | NA |
| 638 | KY407054 | JC101 | China | 2015 | NA |
| 639 | KY407055 | JC162 | China | 2016 | NA |
| 640 | KY407056 | JC097 | China | 2015 | NA |
| 641 | KY407057 | JC108 | China | 2015 | NA |
| 642 | KY407058 | JC114 | China | 2015 | NA |
| 643 | KY407059 | JC099 | China | 2015 | NA |
| 644 | KY407060 | JC117 | China | 2016 | NA |
| 645 | KY407061 | JC120 | China | 2016 | NA |
| 646 | KY407062 | JC121 | China | 2016 | NA |
| 647 | KY407063 | JC122 | China | 2016 | NA |
| 648 | KY407064 | JC124 | China | 2016 | NA |
| 649 | KY407065 | JC127 | China | 2016 | NA |
| 650 | KY407066 | JC143 | China | 2016 | NA |
| 651 | KY407067 | JC146 | China | 2016 | NA |
| 652 | KY407068 | JC152 | China | 2016 | NA |
| 653 | KY407069 | JC165 | China | 2016 | NA |
| 654 | KY407070 | JC168 | China | 2016 | NA |
| 655 | KY407071 | JC169 | China | 2016 | NA |
| 656 | KY407072 | JC175 | China | 2016 | NA |
| 657 | KY407073 | JC158 | China | 2016 | NA |
| 658 | KY407074 | JC177 | China | 2016 | NA |
| 659 | KY407075 | JC179 | China | 2016 | NA |
| 660 | KY407076 | JC180 | China | 2016 | NA |
| 661 | KY407077 | JC181 | China | 2016 | NA |
| 662 | KY407078 | JC182 | China | 2016 | NA |
| 663 | KY407079 | JC184 | China | 2016 | NA |
| 664 | KY407080 | JC187 | China | 2016 | NA |
| 665 | KY407081 | JC188 | China | 2016 | NA |
| 666 | KY407082 | JC189 | China | 2016 | NA |
| 667 | KY407083 | JC190 | China | 2016 | NA |
| 668 | KY407084 | JC191 | China | 2016 | NA |
| 669 | KY407085 | JC192 | China | 2016 | NA |
| 670 | KY407086 | JC173 | China | 2016 | NA |
| 671 | KY407087 | JC174 | China | 2016 | NA |
| 672 | KY407088 | JC167 | China | 2016 | NA |

|     |          |       |       |      |    |
|-----|----------|-------|-------|------|----|
| 673 | KY407089 | JC176 | China | 2016 | NA |
| 674 | KY407090 | JC172 | China | 2016 | NA |
| 675 | KY407091 | JC178 | China | 2016 | NA |
| 676 | KY407092 | JC193 | China | 2016 | NA |
| 677 | KY407093 | JC194 | China | 2016 | NA |
| 678 | KY407094 | JC195 | China | 2016 | NA |
| 679 | KY407095 | JC196 | China | 2016 | NA |
| 680 | KY407096 | JC197 | China | 2016 | NA |
| 681 | KY407097 | JC198 | China | 2016 | NA |
| 682 | KY407098 | JC199 | China | 2016 | NA |
| 683 | KY407099 | JC200 | China | 2016 | NA |
| 684 | KY407100 | JC201 | China | 2016 | NA |
| 685 | KY407101 | JC202 | China | 2016 | NA |
| 686 | KY407102 | JC204 | China | 2016 | NA |
| 687 | KY407103 | JC205 | China | 2016 | NA |
| 688 | KY407104 | JC206 | China | 2016 | NA |
| 689 | KY407105 | JC208 | China | 2016 | NA |
| 690 | KY407106 | JC209 | China | 2016 | NA |
| 691 | KY407107 | JC212 | China | 2016 | NA |
| 692 | KY407108 | JC214 | China | 2016 | NA |
| 693 | KY407109 | JC215 | China | 2016 | NA |
| 694 | KY407110 | JC216 | China | 2016 | NA |
| 695 | KY407111 | JC217 | China | 2016 | NA |
| 696 | KY407112 | JC218 | China | 2016 | NA |
| 697 | KY407113 | JC219 | China | 2016 | NA |
| 698 | KY407114 | JC220 | China | 2016 | NA |
| 699 | KY407115 | JC221 | China | 2016 | NA |
| 700 | KY407116 | JC222 | China | 2016 | NA |
| 701 | KY407117 | JC223 | China | 2016 | NA |
| 702 | KY407118 | JC224 | China | 2016 | NA |
| 703 | KY407119 | JC226 | China | 2016 | NA |
| 704 | KY407120 | JC227 | China | 2016 | NA |
| 705 | KY407121 | JC228 | China | 2016 | NA |
| 706 | KY407122 | JC229 | China | 2016 | NA |
| 707 | KY407123 | JC230 | China | 2016 | NA |
| 708 | KY407124 | JC232 | China | 2016 | NA |
| 709 | KY407125 | JC233 | China | 2016 | NA |
| 710 | KY407126 | JC234 | China | 2016 | NA |
| 711 | KY407127 | JC235 | China | 2016 | NA |
| 712 | KY407128 | JC236 | China | 2016 | NA |
| 713 | KY407129 | JC237 | China | 2016 | NA |
| 714 | KY407130 | JC238 | China | 2016 | NA |
| 715 | KY407131 | JC240 | China | 2016 | NA |
| 716 | KY407132 | JC241 | China | 2016 | NA |
| 717 | KY407133 | JC242 | China | 2016 | NA |
| 718 | KY407134 | JC243 | China | 2016 | NA |
| 719 | KY407135 | JC244 | China | 2016 | NA |
| 720 | KY407136 | JC247 | China | 2016 | NA |
| 721 | KY407137 | JC248 | China | 2016 | NA |
| 722 | KY407138 | JC249 | China | 2016 | NA |
| 723 | KY407139 | JC250 | China | 2016 | NA |
| 724 | KY407140 | JC251 | China | 2016 | NA |

|     |          |                                   |               |      |         |
|-----|----------|-----------------------------------|---------------|------|---------|
| 725 | KY407141 | JC252                             | China         | 2016 | NA      |
| 726 | KY407142 | JC253                             | China         | 2016 | NA      |
| 727 | KY407143 | JC255                             | China         | 2016 | NA      |
| 728 | KY407144 | JC256                             | China         | 2016 | NA      |
| 729 | KY407145 | JC260                             | China         | 2016 | NA      |
| 730 | KY407146 | JC261                             | China         | 2016 | NA      |
| 731 | KY407147 | JC264                             | China         | 2016 | NA      |
| 732 | KY407148 | JC266                             | China         | 2016 | NA      |
| 733 | KY407149 | JC268                             | China         | 2016 | NA      |
| 734 | KY407150 | JC269                             | China         | 2016 | NA      |
| 735 | KY407151 | JC271                             | China         | 2016 | NA      |
| 736 | KY407152 | JC272                             | China         | 2016 | NA      |
| 737 | KY407153 | JC273                             | China         | 2016 | NA      |
| 738 | KY407154 | JC276                             | China         | 2016 | NA      |
| 739 | KY407155 | JC277                             | China         | 2016 | NA      |
| 740 | KY407156 | JC278                             | China         | 2016 | NA      |
| 741 | KY407157 | JC279                             | China         | 2016 | NA      |
| 742 | KY407158 | JC265                             | China         | 2016 | NA      |
| 743 | KY407159 | JC257                             | China         | 2016 | NA      |
| 744 | KY407160 | JC258                             | China         | 2016 | NA      |
| 745 | KY407161 | JC262                             | China         | 2016 | NA      |
| 746 | KY407162 | JC263                             | China         | 2016 | NA      |
| 747 | KY407163 | JC213                             | China         | 2016 | NA      |
| 748 | KY407164 | JC207                             | China         | 2016 | NA      |
| 749 | KY407165 | JC275                             | China         | 2016 | NA      |
| 750 | KY407166 | JC225                             | China         | 2016 | NA      |
| 751 | KY407167 | 130                               | China         | 2013 | NA      |
| 752 | KY407187 | 015101                            | China         | 2015 | NA      |
| 753 | KY407188 | 015102                            | China         | 2015 | NA      |
| 754 | KY407189 | 015103                            | China         | 2015 | NA      |
| 755 | KY407207 | 016001                            | China         | 2016 | NA      |
| 756 | KY407208 | 016002                            | China         | 2016 | NA      |
| 757 | KY407209 | 016003                            | China         | 2016 | NA      |
| 758 | KY407210 | 016P01                            | China         | 2016 | NA      |
| 759 | KY407211 | 016P02                            | China         | 2016 | NA      |
| 760 | KY407212 | 016P03ZS                          | China         | 2016 | NA      |
| 761 | KY421039 | Sydney_Variant_2015               | United States | 2015 | GII.P31 |
| 762 | KY424328 | RockvilleD1                       | United States | 2012 | GII.P31 |
| 763 | KY486271 | GII.Pe-GII.4-Sydney-United_States | United States | 2013 | GII.P31 |
| 764 | KY488572 | D268                              | Taiwan        | 2014 | GII.P31 |
| 765 | KY488573 | D088                              | Taiwan        | 2014 | GII.P31 |
| 766 | KY488574 | D143                              | Taiwan        | 2014 | GII.P31 |
| 767 | KY488575 | D001                              | Taiwan        | 2014 | GII.P31 |
| 768 | KY496327 | WI2138                            | United States | 2012 | GII.P31 |
| 769 | KY628449 | CUHK-NS-1317                      | Hong Kong     | 2017 | NA      |
| 770 | KY679160 | CUHK-NS-1268                      | Hong Kong     | 2017 | NA      |
| 771 | KY679161 | CUHK-NS-1272                      | Hong Kong     | 2017 | NA      |
| 772 | KY679162 | CUHK-NS-1273                      | Hong Kong     | 2017 | NA      |
| 773 | KY679163 | CUHK-NS-1277                      | Hong Kong     | 2017 | NA      |
| 774 | KY679164 | CUHK-NS-1278                      | Hong Kong     | 2017 | NA      |
| 775 | KY679165 | CUHK-NS-1279                      | Hong Kong     | 2017 | NA      |
| 776 | KY679166 | CUHK-NS-1282                      | Hong Kong     | 2017 | NA      |

|     |          |                 |                |      |         |
|-----|----------|-----------------|----------------|------|---------|
| 777 | KY679167 | CUHK-NS-1283    | Hong Kong      | 2017 | NA      |
| 778 | KY679168 | CUHK-NS-1288    | Hong Kong      | 2017 | NA      |
| 779 | KY679169 | CUHK-NS-1293    | Hong Kong      | 2017 | NA      |
| 780 | KY679170 | CUHK-NS-1297    | Hong Kong      | 2017 | NA      |
| 781 | KY679171 | CUHK-NS-1303    | Hong Kong      | 2017 | NA      |
| 782 | KY679172 | CUHK-NS-1310    | Hong Kong      | 2017 | NA      |
| 783 | KY679173 | CUHK-NS-1322    | Hong Kong      | 2017 | NA      |
| 784 | KY887599 | NOR-2559        | United Kingdom | 2016 | GII.P16 |
| 785 | KY887600 | NOR-2558        | United Kingdom | 2016 | GII.P16 |
| 786 | KY887601 | NOR-2565        | United Kingdom | 2016 | GII.P16 |
| 787 | KY887602 | NOR-2516        | United Kingdom | 2015 | GII.P16 |
| 788 | KY887603 | NOR-2515        | United Kingdom | 2015 | GII.P16 |
| 789 | KY887604 | NOR-2518        | United Kingdom | 2015 | GII.P16 |
| 790 | KY887605 | NOR-2520        | United Kingdom | 2015 | GII.P16 |
| 791 | KY905331 | NSW789Z         | Australia      | 2016 | GII.P4  |
| 792 | KY905333 | QLDB101         | Australia      | 2016 | GII.P31 |
| 793 | KY905335 | QLDB309         | Australia      | 2016 | GII.P16 |
| 794 | KY947546 | Titusville_7426 | United States  | 2015 | GII.P4  |
| 795 | KY947547 | Ellsworth_7118  | United States  | 2014 | GII.P4  |
| 796 | KY947549 | CS4243          | United States  | 2016 | GII.P16 |
| 797 | KY947550 | Pasadena_3477   | United States  | 2015 | GII.P16 |
| 798 | LC005720 | y11-V615-5      | Japan          | 2011 | NA      |
| 799 | LC005721 | y11-V627-3      | Japan          | 2011 | NA      |
| 800 | LC005722 | y11-V633-3      | Japan          | 2011 | NA      |
| 801 | LC005723 | y11-V645-27     | Japan          | 2011 | NA      |
| 802 | LC005724 | y11-V648-1      | Japan          | 2011 | NA      |
| 803 | LC005725 | y12-V753-1      | Japan          | 2012 | NA      |
| 804 | LC005726 | y12-V762-1      | Japan          | 2012 | NA      |
| 805 | LC005727 | y12-V780-1      | Japan          | 2012 | NA      |
| 806 | LC005728 | y12-V812-2      | Japan          | 2012 | NA      |
| 807 | LC005729 | y12-V854-3      | Japan          | 2012 | NA      |
| 808 | LC005730 | y12-V849-2      | Japan          | 2013 | NA      |
| 809 | LC005731 | y13-140-1       | Japan          | 2013 | NA      |
| 810 | LC005732 | y13-V938-3      | Japan          | 2013 | NA      |
| 811 | LC005733 | y13-166-1       | Japan          | 2013 | NA      |
| 812 | LC005734 | y13-V988-5      | Japan          | 2013 | NA      |
| 813 | LC005735 | y13-V1010-1     | Japan          | 2014 | NA      |
| 814 | LC018706 | Aichi368-14     | Japan          | 2014 | NA      |
| 815 | LC018707 | AichiNishio7-14 | Japan          | 2014 | NA      |
| 816 | LC018708 | AichiNishio1-14 | Japan          | 2014 | NA      |
| 817 | LC018709 | Aichi352-14     | Japan          | 2014 | NA      |
| 818 | LC018710 | Aichi351-14     | Japan          | 2014 | NA      |
| 819 | LC066046 | OSF78           | Japan          | 2015 | GII.P31 |
| 820 | LC101819 | s120153         | Japan          | 2012 | NA      |
| 821 | LC122789 | EH-69           | Japan          | 2014 | GII.P31 |
| 822 | LC122790 | GU-11           | Japan          | 2013 | GII.P31 |
| 823 | LC122791 | TO-48           | Japan          | 2013 | GII.P31 |
| 824 | LC122792 | MI-17           | Japan          | 2013 | GII.P31 |
| 825 | LC122793 | TO-36           | Japan          | 2013 | GII.P31 |
| 826 | LC122794 | TO-14           | Japan          | 2014 | GII.P31 |
| 827 | LC122795 | TO-3            | Japan          | 2013 | GII.P31 |
| 828 | LC122796 | TO-7            | Japan          | 2013 | GII.P31 |

|     |          |             |           |      |         |
|-----|----------|-------------|-----------|------|---------|
| 829 | LC122797 | TO-38       | Japan     | 2013 | GII.P31 |
| 830 | LC122798 | TO-39       | Japan     | 2013 | GII.P31 |
| 831 | LC122799 | SH-9        | Japan     | 2012 | GII.P31 |
| 832 | LC122800 | TO-40       | Japan     | 2013 | GII.P31 |
| 833 | LC122801 | KU-29       | Japan     | 2012 | GII.P31 |
| 834 | LC122802 | TO-22       | Japan     | 2012 | GII.P31 |
| 835 | LC122803 | TO-24       | Japan     | 2012 | GII.P31 |
| 836 | LC122804 | TO-35       | Japan     | 2013 | GII.P31 |
| 837 | LC122805 | TO-37       | Japan     | 2013 | GII.P31 |
| 838 | LC122806 | TO-42       | Japan     | 2013 | GII.P31 |
| 839 | LC122807 | GU-13       | Japan     | 2013 | GII.P31 |
| 840 | LC122808 | TO-18       | Japan     | 2014 | GII.P31 |
| 841 | LC122809 | TO-5        | Japan     | 2013 | GII.P31 |
| 842 | LC122810 | HO-30       | Japan     | 2014 | GII.P31 |
| 843 | LC122811 | HO-31       | Japan     | 2014 | GII.P31 |
| 844 | LC122812 | TO-12       | Japan     | 2014 | GII.P31 |
| 845 | LC122813 | GU-16       | Japan     | 2014 | GII.P31 |
| 846 | LC122814 | TO-28       | Japan     | 2012 | GII.P31 |
| 847 | LC122815 | TO-44       | Japan     | 2013 | GII.P31 |
| 848 | LC122816 | GU-14       | Japan     | 2013 | GII.P31 |
| 849 | LC122817 | TO-29       | Japan     | 2012 | GII.P31 |
| 850 | LC122818 | MI-16       | Japan     | 2013 | GII.P31 |
| 851 | LC122819 | HO-29       | Japan     | 2014 | GII.P31 |
| 852 | LC122820 | TO-11       | Japan     | 2014 | GII.P31 |
| 853 | LC122821 | GU-12       | Japan     | 2013 | GII.P31 |
| 854 | LC122822 | TO-41       | Japan     | 2013 | GII.P31 |
| 855 | LC122823 | GU-7        | Japan     | 2012 | GII.P31 |
| 856 | LC122824 | KA-4        | Japan     | 2013 | GII.P31 |
| 857 | LC122825 | TO-33       | Japan     | 2013 | GII.P31 |
| 858 | LC122826 | TO-45       | Japan     | 2013 | GII.P31 |
| 859 | LC122827 | TO-1        | Japan     | 2013 | GII.P31 |
| 860 | LC122828 | TO-4        | Japan     | 2013 | GII.P31 |
| 861 | LC122829 | KA-24       | Japan     | 2011 | GII.P31 |
| 862 | LC122830 | KA-9        | Japan     | 2013 | GII.P31 |
| 863 | LC133344 | OsakaSB2-1  | Japan     | 2014 | GII.P31 |
| 864 | LC153121 | OH16002     | Japan     | 2016 | GII.P16 |
| 865 | LC153122 | OC16023     | Japan     | 2016 | GII.P16 |
| 866 | LC175468 | Kawasaki194 | Japan     | 2016 | GII.P16 |
| 867 | LC177655 | NVN13.400   | Viet Nam  | 2013 | GII.P31 |
| 868 | LC177656 | NVN13.1441  | Viet Nam  | 2013 | GII.P31 |
| 869 | LC177657 | NVN14.629   | Viet Nam  | 2014 | GII.P31 |
| 870 | LC177658 | NVN15.706   | Viet Nam  | 2015 | GII.P4  |
| 871 | LC177659 | NVN15.1296  | Viet Nam  | 2015 | GII.P31 |
| 872 | LC177660 | NVN15.1495  | Viet Nam  | 2015 | GII.P31 |
| 873 | LC177661 | NVN15.1506  | Viet Nam  | 2015 | GII.P31 |
| 874 | LC325217 | AichiF104   | Japan     | 2016 | GII.P16 |
| 875 | LC331997 | AichiF25    | Japan     | 2017 | GII.P16 |
| 876 | LC390332 | Toyama18048 | Japan     | 2017 | GII.P12 |
| 877 | LC421227 | 330077      | Japan     | 2017 | GII.P12 |
| 878 | LC421228 | 330078      | Japan     | 2017 | GII.P12 |
| 879 | LC597114 | SOEP100     | Indonesia | 2016 | GII.P31 |
| 880 | LC597115 | SOEP127     | Indonesia | 2016 | GII.P31 |

|     |          |                     |                |      |         |
|-----|----------|---------------------|----------------|------|---------|
| 881 | LC597116 | SOEP134             | Indonesia      | 2016 | GII.P31 |
| 882 | LC597127 | STM137              | Indonesia      | 2016 | GII.P31 |
| 883 | LC597128 | STM150              | Indonesia      | 2016 | GII.P31 |
| 884 | LC597129 | STM171              | Indonesia      | 2016 | GII.P31 |
| 885 | LC597130 | STM194              | Indonesia      | 2016 | GII.P31 |
| 886 | LC597133 | STM221              | Indonesia      | 2016 | GII.P16 |
| 887 | LC644993 | 1503F               | Japan          | 2021 | GII.P31 |
| 888 | LC645995 | 19-177              | Japan          | 2019 | NA      |
| 889 | LC645996 | 19-187              | Japan          | 2020 | NA      |
| 890 | LC645997 | 19-219              | Japan          | 2020 | NA      |
| 891 | LC645998 | 19-232              | Japan          | 2020 | NA      |
| 892 | LC699526 | 1851_Tokyo          | Japan          | 2019 | GII.P31 |
| 893 | LC699527 | 2047_Tokyo          | Japan          | 2019 | GII.P31 |
| 894 | LC699528 | 2260_Tokyo          | Japan          | 2020 | GII.P31 |
| 895 | LC699529 | 2448_Tokyo          | Japan          | 2020 | GII.P31 |
| 896 | LC699530 | 2460_Tokyo          | Japan          | 2020 | GII.P31 |
| 897 | LC699531 | 2497_Tokyo          | Japan          | 2020 | GII.P31 |
| 898 | LC699532 | 2597_Tokyo          | Japan          | 2020 | GII.P31 |
| 899 | LC699533 | 58_Tokyo            | Japan          | 2021 | GII.P31 |
| 900 | LC699534 | 136_Tokyo           | Japan          | 2021 | GII.P31 |
| 901 | LC699535 | 211_Tokyo           | Japan          | 2021 | GII.P31 |
| 902 | LC699536 | 408_Tokyo           | Japan          | 2021 | GII.P31 |
| 903 | LC699537 | 414_Tokyo           | Japan          | 2021 | GII.P31 |
| 904 | LC699538 | 759_Tokyo           | Japan          | 2021 | GII.P31 |
| 905 | LC699539 | 1143_Tokyo          | Japan          | 2022 | GII.P31 |
| 906 | LC699540 | 1145_Tokyo          | Japan          | 2022 | GII.P31 |
| 907 | LC699541 | 1185_Tokyo          | Japan          | 2022 | GII.P31 |
| 908 | LN854566 | Groningen01         | Netherlands    | 2012 | GII.P4  |
| 909 | LN854567 | Groningen02         | Netherlands    | 2012 | GII.P31 |
| 910 | MG002630 | BNE1                | Australia      | 2017 | GII.P16 |
| 911 | MG002631 | BNE2                | Australia      | 2017 | GII.P16 |
| 912 | MG002632 | BNE3                | Australia      | 2017 | GII.P4  |
| 913 | MG002633 | BNE4                | Australia      | 2017 | GII.P16 |
| 914 | MG002634 | BNE5                | Australia      | 2017 | GII.P4  |
| 915 | MG214988 | JN010               | China          | 2017 | GII.P31 |
| 916 | MG733284 | WZ198               | China          | 2013 | GII.P31 |
| 917 | MG733285 | WZ320               | China          | 2013 | GII.P31 |
| 918 | MG733286 | WZ700               | China          | 2013 | GII.P31 |
| 919 | MG733287 | WZ785               | China          | 2013 | GII.P31 |
| 920 | MG786781 | DBM15-156           | Thailand       | 2015 | GII.P31 |
| 921 | MG892929 | NS17-A869           | Russia         | 2017 | GII.P16 |
| 922 | MH188080 | 413-7456_ST5        | Australia      | 2017 | GII.P4  |
| 923 | MH218605 | NORO_134_07_02_2015 | United Kingdom | 2015 | GII.P31 |
| 924 | MH218606 | NORO_135_30_01_2015 | United Kingdom | 2015 | GII.P4  |
| 925 | MH218607 | NORO_136_20_02_2015 | United Kingdom | 2015 | GII.P4  |
| 926 | MH218608 | NORO_137_08_06_2015 | United Kingdom | 2015 | GII.P31 |
| 927 | MH218609 | NORO_138_23_10_2014 | United Kingdom | 2014 | GII.P4  |
| 928 | MH218610 | NORO_139_24_10_2014 | United Kingdom | 2014 | GII.P4  |
| 929 | MH218611 | NORO_140_26_10_2014 | United Kingdom | 2014 | GII.P4  |
| 930 | MH218612 | NORO_141_02_11_2014 | United Kingdom | 2014 | GII.P4  |
| 931 | MH218613 | NORO_142_05_11_2014 | United Kingdom | 2014 | GII.P4  |
| 932 | MH218614 | NORO_143_12_11_2014 | United Kingdom | 2014 | GII.P31 |

|     |          |                       |                |      |         |
|-----|----------|-----------------------|----------------|------|---------|
| 933 | MH218615 | NORO_144_13_11_2014   | United Kingdom | 2014 | GII.P31 |
| 934 | MH218616 | NORO_145_21_11_2014   | United Kingdom | 2014 | GII.P31 |
| 935 | MH218617 | NORO_147_05_01_2015   | United Kingdom | 2015 | GII.P4  |
| 936 | MH218619 | NORO_148_08_01_2015   | United Kingdom | 2015 | GII.P4  |
| 937 | MH218620 | NORO_149_22_01_2015   | United Kingdom | 2015 | GII.P31 |
| 938 | MH218621 | NORO_150_22_01_2015   | United Kingdom | 2015 | GII.P31 |
| 939 | MH218622 | NORO_151_31_01_2015   | United Kingdom | 2015 | GII.P31 |
| 940 | MH218623 | NORO_152_02_02_2015   | United Kingdom | 2015 | GII.P31 |
| 941 | MH218624 | NORO_153_19_02_2015   | United Kingdom | 2015 | GII.P31 |
| 942 | MH218625 | NORO_154_02_03_2015   | United Kingdom | 2015 | GII.P31 |
| 943 | MH218626 | NORO_155_02_03_2015   | United Kingdom | 2015 | GII.P31 |
| 944 | MH218627 | NORO_156_02_03_2015   | United Kingdom | 2015 | GII.P31 |
| 945 | MH218628 | NORO_157_03_03_2015   | United Kingdom | 2015 | GII.P31 |
| 946 | MH218629 | NORO_158_01_04_2015   | United Kingdom | 2015 | GII.P31 |
| 947 | MH218631 | NORO_161_27_04_2015   | United Kingdom | 2015 | GII.P31 |
| 948 | MH218632 | NORO_162-1_03_05_2015 | United Kingdom | 2015 | GII.P31 |
| 949 | MH218633 | NORO_164_04_06_2015   | United Kingdom | 2015 | GII.P4  |
| 950 | MH218634 | NORO_165_21_06_2015   | United Kingdom | 2015 | GII.P31 |
| 951 | MH218635 | NORO_166_21_06_2015   | United Kingdom | 2015 | GII.P31 |
| 952 | MH218636 | NORO_167_23_06_2015   | United Kingdom | 2015 | GII.P4  |
| 953 | MH218637 | NORO_168_23_06_2015   | United Kingdom | 2015 | GII.P31 |
| 954 | MH218638 | NORO_169_02_07_2015   | United Kingdom | 2015 | GII.P31 |
| 955 | MH218652 | NORO_184_23_09_2015   | United Kingdom | 2015 | GII.P4  |
| 956 | MH218662 | NORO_201_30_11_2015   | United Kingdom | 2015 | GII.P31 |
| 957 | MH218663 | NORO_205_02_12_2015   | United Kingdom | 2015 | GII.P31 |
| 958 | MH218665 | NORO_207_07_12_2015   | United Kingdom | 2015 | GII.P4  |
| 959 | MH218669 | NORO_211_16_12_2015   | United Kingdom | 2015 | GII.P4  |
| 960 | MH218670 | NORO_212_17_12_2015   | United Kingdom | 2015 | GII.P4  |
| 961 | MH218674 | NORO_216_22_12_2015   | United Kingdom | 2015 | GII.P31 |
| 962 | MH218684 | NORO_226_06_01_2016   | United Kingdom | 2016 | GII.P16 |
| 963 | MH218685 | NORO_227_07_01_2016   | United Kingdom | 2016 | GII.P16 |
| 964 | MH218691 | NORO_234_25_01_2016   | United Kingdom | 2016 | GII.P4  |
| 965 | MH218694 | NORO_31_11_09_2014    | United Kingdom | 2014 | GII.P31 |
| 966 | MH218695 | NORO_32_19_06_2014    | United Kingdom | 2014 | GII.P4  |
| 967 | MH218698 | NORO_38_09_08_2014    | United Kingdom | 2014 | GII.P4  |
| 968 | MH218699 | NORO_39_26_08_2014    | United Kingdom | 2014 | GII.P31 |
| 969 | MH218700 | NORO_40-1_01_09_2014  | United Kingdom | 2014 | GII.P31 |
| 970 | MH218701 | NORO_42_01_09_2014    | United Kingdom | 2014 | GII.P31 |
| 971 | MH218702 | NORO_43_02_07_2014    | United Kingdom | 2014 | GII.P31 |
| 972 | MH218703 | NORO_45_31_07_2014    | United Kingdom | 2014 | GII.P4  |
| 973 | MH218704 | NORO_46_24_08_2014    | United Kingdom | 2014 | GII.P4  |
| 974 | MH218705 | NORO_47_29_07_2014    | United Kingdom | 2014 | GII.P31 |
| 975 | MH218706 | NORO_48-1_01_07_2014  | United Kingdom | 2014 | GII.P31 |
| 976 | MH218707 | NORO_49_15_10_2014    | United Kingdom | 2014 | GII.P31 |
| 977 | MH218708 | NORO_50_30_07_2014    | United Kingdom | 2014 | GII.P31 |
| 978 | MH218709 | NORO_52-1_16_07_2014  | United Kingdom | 2014 | GII.P31 |
| 979 | MH218710 | NORO_53_19_07_2014    | United Kingdom | 2014 | GII.P4  |
| 980 | MH218711 | NORO_54-1_08_09_2014  | United Kingdom | 2014 | GII.P31 |
| 981 | MH218713 | NORO_58_25_07_2014    | United Kingdom | 2014 | GII.P4  |
| 982 | MH218714 | NORO_58-1_13_10_2015  | United Kingdom | 2015 | GII.P4  |
| 983 | MH218715 | NORO_59_08_07_2014    | United Kingdom | 2014 | GII.P31 |
| 984 | MH218716 | NORO_60_28_09_2014    | United Kingdom | 2014 | GII.P4  |



|      |          |                      |                |      |         |
|------|----------|----------------------|----------------|------|---------|
| 985  | MH218718 | NORO_68-6_28_08_2014 | United Kingdom | 2014 | GII.P4  |
| 986  | MH229930 | HNZZ201512           | China          | 2015 | NA      |
| 987  | MH229931 | HNZZ201514           | China          | 2015 | NA      |
| 988  | MH229932 | HNZZ201519           | China          | 2015 | NA      |
| 989  | MH229933 | HNZZ201522           | China          | 2015 | NA      |
| 990  | MH229934 | HNZZ201525           | China          | 2015 | NA      |
| 991  | MH229935 | HNZZ201526           | China          | 2015 | NA      |
| 992  | MH229936 | HNZZ201602           | China          | 2016 | NA      |
| 993  | MH229937 | HNZZ201612           | China          | 2016 | NA      |
| 994  | MH229938 | HNZZ201621           | China          | 2016 | NA      |
| 995  | MH229939 | HNZZ201629           | China          | 2016 | NA      |
| 996  | MH229940 | HNZZ201707           | China          | 2017 | NA      |
| 997  | MH229941 | HNZZ201720           | China          | 2017 | NA      |
| 998  | MH229942 | HNZZ201743           | China          | 2017 | NA      |
| 999  | MH260479 | ST709                | United States  | 2017 | GII.P16 |
| 1000 | MH260480 | ST680                | United States  | 2017 | GII.P16 |
| 1001 | MH260481 | ST545                | United States  | 2017 | GII.P16 |
| 1002 | MH260482 | ST480                | United States  | 2017 | GII.P16 |
| 1003 | MH260483 | ST466                | United States  | 2017 | GII.P16 |
| 1004 | MH260484 | ST435                | United States  | 2017 | GII.P16 |
| 1005 | MH260485 | ST420                | United States  | 2017 | GII.P16 |
| 1006 | MH260486 | ST347                | United States  | 2017 | GII.P16 |
| 1007 | MH260488 | ST305                | United States  | 2017 | GII.P16 |
| 1008 | MH260489 | ST295                | United States  | 2017 | GII.P16 |
| 1009 | MH260490 | ST283                | United States  | 2017 | GII.P16 |
| 1010 | MH260491 | ST256                | United States  | 2017 | GII.P16 |
| 1011 | MH260492 | ST254                | United States  | 2017 | GII.P16 |
| 1012 | MH260495 | ST166                | United States  | 2017 | GII.P16 |
| 1013 | MH260496 | ST165                | United States  | 2017 | GII.P16 |
| 1014 | MH260497 | ST161                | United States  | 2017 | GII.P16 |
| 1015 | MH260498 | ST156                | United States  | 2017 | GII.P16 |
| 1016 | MH260499 | ST155                | United States  | 2017 | GII.P16 |
| 1017 | MH260502 | ST134                | United States  | 2017 | GII.P16 |
| 1018 | MH260503 | ST114                | United States  | 2017 | GII.P16 |
| 1019 | MH260504 | ST111                | United States  | 2017 | GII.P16 |
| 1020 | MH260505 | ST110                | United States  | 2017 | GII.P16 |
| 1021 | MH260506 | ST109                | United States  | 2017 | GII.P16 |
| 1022 | MH260508 | ST103                | United States  | 2017 | GII.P16 |
| 1023 | MH279823 | ST374                | United States  | 2017 | GII.P16 |
| 1024 | MH279825 | ST709                | United States  | 2017 | GII.P16 |
| 1025 | MH540350 | E11235               | France         | 2012 | NA      |
| 1026 | MH702256 | ETR-NV-049           | Cambodia       | 2015 | GII.P31 |
| 1027 | MH702258 | ETR-NV-080           | Nepal          | 2013 | GII.P31 |
| 1028 | MH702266 | ETR-NV-130           | Bhutan         | 2015 | GII.P4  |
| 1029 | MH702269 | ETR-NV-177           | Bhutan         | 2012 | GII.P31 |
| 1030 | MH702270 | ETR-NV-180           | Bhutan         | 2012 | GII.P31 |
| 1031 | MH702271 | ETR-NV-181           | Bhutan         | 2012 | GII.P31 |
| 1032 | MH702272 | ETR-NV-183           | Bhutan         | 2012 | GII.P31 |
| 1033 | MH702273 | ETR-NV-184           | Bhutan         | 2012 | GII.P31 |
| 1034 | MH702274 | ETR-NV-185           | Bhutan         | 2012 | GII.P31 |
| 1035 | MH702275 | ETR-NV-186           | Bhutan         | 2012 | GII.P31 |
| 1036 | MH922873 | AlbertaEI084         | Canada         | 2016 | NA      |

|      |          |                |               |      |         |
|------|----------|----------------|---------------|------|---------|
| 1037 | MH922874 | AlbertaEI277   | Canada        | 2016 | NA      |
| 1038 | MH922875 | AlbertaEI487   | Canada        | 2017 | GII.P16 |
| 1039 | MH922876 | AlbertaEI231   | Canada        | 2018 | GII.P16 |
| 1040 | MH979230 | CGMH1411       | Taiwan        | 2018 | GII.P31 |
| 1041 | MK070152 | Cairo12        | Egypt         | 2016 | NA      |
| 1042 | MK070153 | Cairo14        | Egypt         | 2016 | NA      |
| 1043 | MK070154 | Cairo15        | Egypt         | 2016 | NA      |
| 1044 | MK070155 | Cairo16        | Egypt         | 2016 | NA      |
| 1045 | MK073885 | Fresno-0182    | United States | 2016 | GII.P16 |
| 1046 | MK073888 | Roscommon-0105 | United States | 2016 | GII.P16 |
| 1047 | MK073889 | St.Louis-0113  | United States | 2016 | GII.P4  |
| 1048 | MK073890 | Gallatin-0036  | United States | 2016 | GII.P16 |
| 1049 | MK073891 | Gallatin-0038  | United States | 2016 | GII.P16 |
| 1050 | MK073894 | Nashville-0085 | United States | 2016 | GII.P16 |
| 1051 | MK213510 | NSW4490        | Australia     | 2014 | NA      |
| 1052 | MK213511 | NSW559W        | Australia     | 2014 | NA      |
| 1053 | MK213512 | NSW804E        | Australia     | 2014 | NA      |
| 1054 | MK213513 | NSW843R        | Australia     | 2014 | NA      |
| 1055 | MK213514 | NSW656Y        | Australia     | 2014 | NA      |
| 1056 | MK213515 | NSW624J        | Australia     | 2015 | NA      |
| 1057 | MK213516 | NSW1208        | Australia     | 2015 | NA      |
| 1058 | MK213517 | NSW4644        | Australia     | 2015 | NA      |
| 1059 | MK213518 | NSW799Y        | Australia     | 2015 | NA      |
| 1060 | MK213519 | NSW859T        | Australia     | 2015 | NA      |
| 1061 | MK213520 | NSW707E        | Australia     | 2015 | NA      |
| 1062 | MK213521 | NSW180D        | Australia     | 2016 | NA      |
| 1063 | MK213522 | NSW2530        | Australia     | 2016 | NA      |
| 1064 | MK213523 | NSW8482        | Australia     | 2016 | NA      |
| 1065 | MK213524 | NSW17N137      | Australia     | 2017 | NA      |
| 1066 | MK213525 | NSW2811        | Australia     | 2017 | NA      |
| 1067 | MK213526 | NSW17N48       | Australia     | 2017 | NA      |
| 1068 | MK213527 | NSW094P        | Australia     | 2015 | NA      |
| 1069 | MK213528 | NSW762O        | Australia     | 2015 | NA      |
| 1070 | MK213529 | NSW417P        | Australia     | 2015 | NA      |
| 1071 | MK213530 | NSW206B        | Australia     | 2016 | NA      |
| 1072 | MK213531 | NSW1580        | Australia     | 2016 | NA      |
| 1073 | MK213532 | NSW772S        | Australia     | 2016 | NA      |
| 1074 | MK213533 | NSW0297        | Australia     | 2016 | NA      |
| 1075 | MK213534 | NSW012J        | Australia     | 2016 | NA      |
| 1076 | MK213535 | NSW8193        | Australia     | 2016 | NA      |
| 1077 | MK213536 | NSW9405        | Australia     | 2017 | NA      |
| 1078 | MK213537 | NSW3842        | Australia     | 2017 | NA      |
| 1079 | MK213538 | NSW4272        | Australia     | 2017 | NA      |
| 1080 | MK213539 | NSW776R        | Australia     | 2014 | NA      |
| 1081 | MK213540 | NSW8653        | Australia     | 2015 | NA      |
| 1082 | MK213541 | NSW3648        | Australia     | 2016 | NA      |
| 1083 | MK213542 | NSW9639        | Australia     | 2016 | NA      |
| 1084 | MK213543 | NSW17N128      | Australia     | 2017 | NA      |
| 1085 | MK213544 | NSW6351        | Australia     | 2017 | NA      |
| 1086 | MK213545 | NSW9983        | Australia     | 2017 | NA      |
| 1087 | MK213546 | NSW17N100      | Australia     | 2017 | NA      |
| 1088 | MK213547 | NSW3704        | Australia     | 2017 | NA      |

|      |          |                   |               |      |         |
|------|----------|-------------------|---------------|------|---------|
| 1089 | MK396774 | ETR-NV-107        | Nepal         | 2014 | GII.P31 |
| 1090 | MK483909 | NS18-A1494        | Russia        | 2018 | GII.P16 |
| 1091 | MK614062 | JSWXOB1217        | China         | 2017 | GII.P31 |
| 1092 | MK629457 | Auglaize0259      | United States | 2016 | GII.P16 |
| 1093 | MK685977 | GJ71              | South Korea   | 2013 | NA      |
| 1094 | MK752933 | Grant0016         | United States | 2018 | GII.P16 |
| 1095 | MK752934 | Grant0015         | United States | 2018 | GII.P16 |
| 1096 | MK752936 | St.Croix0439      | United States | 2017 | GII.P16 |
| 1097 | MK752937 | CerroGordo0434    | United States | 2017 | GII.P16 |
| 1098 | MK752938 | Brown0441         | United States | 2017 | GII.P16 |
| 1099 | MK752942 | Marathon0626      | United States | 2016 | GII.P16 |
| 1100 | MK752943 | LaCrosse0643      | United States | 2016 | GII.P16 |
| 1101 | MK752948 | Walworth0399      | United States | 2013 | GII.P31 |
| 1102 | MK753017 | Lane0371          | United States | 2017 | GII.P16 |
| 1103 | MK753018 | Clackamas0373     | United States | 2017 | GII.P16 |
| 1104 | MK753028 | Pima0257          | United States | 2014 | GII.P4  |
| 1105 | MK753029 | SanDiego0043      | United States | 2016 | GII.P16 |
| 1106 | MK753030 | Marin0375         | United States | 2015 | GII.P16 |
| 1107 | MK753032 | SanJoaquin0116    | United States | 2016 | GII.P16 |
| 1108 | MK754442 | BaltimoreCity0391 | United States | 2015 | GII.P16 |
| 1109 | MK754444 | Baltimore0201     | United States | 2017 | GII.P16 |
| 1110 | MK754446 | Washington0207    | United States | 2018 | GII.P16 |
| 1111 | MK756033 | Alameda0771       | United States | 2016 | GII.P16 |
| 1112 | MK756034 | Alameda0766       | United States | 2016 | GII.P16 |
| 1113 | MK756035 | Alameda0787       | United States | 2016 | GII.P16 |
| 1114 | MK756036 | Alameda0788       | United States | 2016 | GII.P16 |
| 1115 | MK756037 | Alameda0792       | United States | 2016 | GII.P16 |
| 1116 | MK756038 | Alameda0791       | United States | 2016 | GII.P16 |
| 1117 | MK762558 | CS0031            | United States | 2014 | GII.P31 |
| 1118 | MK762561 | CS0014            | United States | 2018 | GII.P4  |
| 1119 | MK762562 | CS0193            | United States | 2016 | GII.P16 |
| 1120 | MK762563 | CS0194            | United States | 2016 | GII.P16 |
| 1121 | MK762564 | CS0195            | United States | 2016 | GII.P16 |
| 1122 | MK762566 | CS0275            | United States | 2016 | GII.P16 |
| 1123 | MK762567 | CS0276            | United States | 2016 | GII.P16 |
| 1124 | MK762568 | CS0651            | United States | 2016 | GII.P16 |
| 1125 | MK762569 | CS1009            | United States | 2017 | GII.P16 |
| 1126 | MK762570 | CS1010            | United States | 2017 | GII.P16 |
| 1127 | MK762621 | Jackson1608       | United States | 2017 | GII.P16 |
| 1128 | MK762622 | Jackson0849       | United States | 2017 | GII.P4  |
| 1129 | MK762623 | Jackson0853       | United States | 2017 | GII.P4  |
| 1130 | MK762624 | Jackson4273       | United States | 2017 | GII.P16 |
| 1131 | MK762629 | Lee0113           | United States | 2017 | GII.P16 |
| 1132 | MK762630 | Broward1056       | United States | 2015 | GII.P31 |
| 1133 | MK762632 | Natrona0468       | United States | 2017 | GII.P16 |
| 1134 | MK762635 | LosAngeles0190    | United States | 2017 | GII.P16 |
| 1135 | MK762636 | LosAngeles0196    | United States | 2017 | GII.P16 |
| 1136 | MK762637 | LaPorte0381       | United States | 2015 | GII.P16 |
| 1137 | MK762638 | Miami0181         | United States | 2017 | GII.P16 |
| 1138 | MK762639 | Porter0184        | United States | 2017 | GII.P16 |
| 1139 | MK762719 | ETR-NV-093        | Nepal         | 2013 | GII.P31 |
| 1140 | MK762746 | Hardin1028        | United States | 2016 | GII.P16 |

|      |          |               |               |      |         |
|------|----------|---------------|---------------|------|---------|
| 1141 | MK764013 | Wayne0078     | United States | 2016 | GII.P16 |
| 1142 | MK764015 | Ingham0228    | United States | 2017 | GII.P16 |
| 1143 | MK764016 | Bay0244       | United States | 2018 | GII.P16 |
| 1144 | MK764018 | Stafford0184  | United States | 2016 | GII.P16 |
| 1145 | MK764019 | Arlington0551 | United States | 2015 | GII.P31 |
| 1146 | MK764021 | Loudoun0411   | United States | 2017 | GII.P16 |
| 1147 | MK773584 | Olmsted0258   | United States | 2016 | GII.P16 |
| 1148 | MK773585 | Olmsted0261   | United States | 2016 | GII.P16 |
| 1149 | MK773586 | Ramsey0269    | United States | 2017 | GII.P16 |
| 1150 | MK775032 | Wood0352      | United States | 2017 | GII.P16 |
| 1151 | MK789434 | 3546          | Spain         | 2016 | GII.P4  |
| 1152 | MK789435 | 3549          | Spain         | 2016 | GII.P31 |
| 1153 | MK789436 | 3552          | Spain         | 2016 | GII.P4  |
| 1154 | MK907796 | G19_032       | France        | 2014 | GII.P31 |
| 1155 | MK907797 | G19_033       | France        | 2014 | GII.P31 |
| 1156 | MK928496 | CU_21953      | Thailand      | 2018 | GII.P31 |
| 1157 | MK928497 | CU_21954      | Thailand      | 2018 | GII.P31 |
| 1158 | MK934772 | 2015HN08      | China         | 2015 | GII.P31 |
| 1159 | MN220720 | GT-1          | United States | 2017 | GII.P16 |
| 1160 | MN525275 | JH28          | Brazil        | 2016 | GII.P16 |
| 1161 | MN525276 | JH29          | Brazil        | 2016 | GII.P16 |
| 1162 | MN588299 | HNV1          | China         | 2019 | GII.P31 |
| 1163 | MN588300 | HNV6          | China         | 2019 | GII.P31 |
| 1164 | MN588301 | HNV9          | China         | 2019 | GII.P31 |
| 1165 | MN588302 | HNV13         | China         | 2019 | GII.P31 |
| 1166 | MN588303 | HNV16         | China         | 2019 | GII.P31 |
| 1167 | MN588304 | HNV20         | China         | 2019 | GII.P31 |
| 1168 | MN588305 | HNV21         | China         | 2019 | GII.P31 |
| 1169 | MN588306 | HNV22         | China         | 2019 | GII.P31 |
| 1170 | MN588307 | QNV114        | China         | 2019 | GII.P31 |
| 1171 | MN703761 | MI_2016_feces | United States | 2016 | GII.P31 |
| 1172 | MN782359 | 11617         | United States | 2017 | GII.P16 |
| 1173 | MN897754 | Chippewa0181  | United States | 2018 | GII.P31 |
| 1174 | MN897755 | Polk0185      | United States | 2018 | GII.P16 |
| 1175 | MN897756 | Shawano0193   | United States | 2018 | GII.P16 |
| 1176 | MN996297 | SCD1055_1     | China         | 2018 | GII.P16 |
| 1177 | MN996299 | SCD1062_2     | China         | 2018 | GII.P16 |
| 1178 | MT026582 | Aiken0160     | United States | 2019 | GII.P4  |
| 1179 | MT028542 | Allegany0230  | United States | 2018 | GII.P31 |
| 1180 | MT029316 | Helena0207    | United States | 2018 | GII.P16 |
| 1181 | MT031761 | Brevard0199   | United States | 2017 | GII.P16 |
| 1182 | MT031821 | Davidson0138  | United States | 2019 | GII.P16 |
| 1183 | MT032004 | Buchanan0126  | United States | 2018 | GII.P16 |
| 1184 | MT158858 | xbfx1926      | China         | 2019 | GII.P31 |
| 1185 | MT158859 | xbfx1927      | China         | 2019 | GII.P31 |
| 1186 | MT218311 | 014_Araguaina | Brazil        | 2014 | GII.P31 |
| 1187 | MT232050 | 122           | Netherlands   | 2014 | GII.P31 |
| 1188 | MT238666 | 526-1         | United States | 2016 | GII.P16 |
| 1189 | MT238667 | 782-1         | United States | 2018 | GII.P16 |
| 1190 | MT238668 | 782-3         | United States | 2018 | GII.P16 |
| 1191 | MT238670 | 259-1         | United States | 2018 | GII.P16 |
| 1192 | MT238671 | 259-2         | United States | 2018 | GII.P16 |

|      |          |              |                |      |         |
|------|----------|--------------|----------------|------|---------|
| 1193 | MT238672 | 259-3        | United States  | 2018 | GII.P16 |
| 1194 | MT344179 | 526-2        | United States  | 2015 | GII.P16 |
| 1195 | MT344180 | 782-2        | United States  | 2018 | GII.P16 |
| 1196 | MT362912 | 432-1        | United States  | 2017 | GII.P4  |
| 1197 | MT362913 | 432-3        | United States  | 2017 | GII.P4  |
| 1198 | MT367328 | 526-3        | United States  | 2016 | GII.P16 |
| 1199 | MT420909 | 510-3        | United States  | 2015 | GII.P31 |
| 1200 | MT439866 | 510-2        | United States  | 2015 | GII.P31 |
| 1201 | MT474032 | JH11         | Brazil         | 2013 | GII.P31 |
| 1202 | MT474033 | JH12         | Brazil         | 2013 | GII.P31 |
| 1203 | MT474034 | JH13         | Brazil         | 2014 | GII.P31 |
| 1204 | MT474036 | JH15         | Brazil         | 2014 | NA      |
| 1205 | MT474038 | JH16         | Brazil         | 2014 | GII.P31 |
| 1206 | MT474039 | JH17         | Brazil         | 2014 | GII.P31 |
| 1207 | MT474040 | JH19         | Brazil         | 2015 | GII.P31 |
| 1208 | MT474041 | JH21         | Brazil         | 2015 | GII.P31 |
| 1209 | MT474042 | JH22         | Brazil         | 2015 | GII.P31 |
| 1210 | MT474043 | JH23         | Brazil         | 2015 | GII.P31 |
| 1211 | MT474044 | JH2          | Brazil         | 2012 | GII.P31 |
| 1212 | MT474047 | JH34         | Brazil         | 2014 | GII.P31 |
| 1213 | MT474048 | JH37         | Brazil         | 2013 | GII.P31 |
| 1214 | MT474049 | JH38         | Brazil         | 2013 | GII.P31 |
| 1215 | MT474050 | JH40         | Brazil         | 2013 | GII.P31 |
| 1216 | MT474051 | JH5          | Brazil         | 2012 | GII.P31 |
| 1217 | MT474052 | JH6          | Brazil         | 2012 | GII.P31 |
| 1218 | MT537605 | 259-1        | United States  | 2018 | GII.P16 |
| 1219 | MT537633 | 259-2        | United States  | 2018 | GII.P16 |
| 1220 | MT537634 | 259-3        | United States  | 2018 | GII.P16 |
| 1221 | MT537941 | 259-2        | United States  | 2018 | GII.P16 |
| 1222 | MT712157 | CA-RGDS-1089 | United States  | 2016 | GII.P31 |
| 1223 | MT725762 | CA-RGDS-1091 | United States  | 2017 | GII.P4  |
| 1224 | MT726225 | CA-RGDS-1092 | United States  | 2018 | GII.P31 |
| 1225 | MW009070 | 432-2        | United States  | 2017 | GII.P4  |
| 1226 | MW009071 | 510-1        | United States  | 2015 | GII.P31 |
| 1227 | MW019618 | 1026         | Botswana       | 2016 | GII.P31 |
| 1228 | MW019619 | 1059         | Botswana       | 2017 | GII.P31 |
| 1229 | MW019620 | 1079         | Botswana       | 2017 | GII.P31 |
| 1230 | MW019621 | 4020         | Botswana       | 2017 | GII.P31 |
| 1231 | MW019622 | 3029         | Botswana       | 2017 | GII.P31 |
| 1232 | MW019956 | 1048         | Botswana       | 2017 | GII.P31 |
| 1233 | MW019957 | 1089         | Botswana       | 2017 | GII.P31 |
| 1234 | MW019958 | 1137         | Botswana       | 2018 | GII.P31 |
| 1235 | MW019959 | 2049         | Botswana       | 2017 | GII.P31 |
| 1236 | MW045404 | 3030         | Botswana       | 2017 | NA      |
| 1237 | MW045406 | 2048         | Botswana       | 2017 | GII.P31 |
| 1238 | MW284780 | P1D10        | United Kingdom | 2013 | GII.P4  |
| 1239 | MW284781 | P1D6         | United Kingdom | 2013 | GII.P4  |
| 1240 | MW284782 | P1D5         | United Kingdom | 2013 | GII.P4  |
| 1241 | MW284783 | P1D3         | United Kingdom | 2013 | GII.P4  |
| 1242 | MW305527 | ONVHH2290    | Peru           | 2014 | GII.P31 |
| 1243 | MW305528 | ONVHH2342    | Peru           | 2014 | GII.P31 |
| 1244 | MW305530 | ONVHH1493    | Peru           | 2013 | GII.P31 |

|      |          |             |               |      |         |
|------|----------|-------------|---------------|------|---------|
| 1245 | MW305534 | ONVHH0711   | Peru          | 2013 | GII.P31 |
| 1246 | MW305535 | ONVHH0051   | Peru          | 2013 | GII.P31 |
| 1247 | MW305548 | 55HBO       | Paraguay      | 2016 | GII.P16 |
| 1248 | MW305553 | 170HBO      | Paraguay      | 2016 | GII.P16 |
| 1249 | MW305557 | 211HBO      | Paraguay      | 2016 | GII.P16 |
| 1250 | MW305558 | 249HBO      | Paraguay      | 2016 | GII.P16 |
| 1251 | MW305560 | 278HBO      | Paraguay      | 2016 | GII.P16 |
| 1252 | MW305617 | Arg10907    | Argentina     | 2012 | GII.P31 |
| 1253 | MW305621 | Arg12774    | Argentina     | 2014 | GII.P31 |
| 1254 | MW305623 | Arg12866    | Argentina     | 2014 | GII.P31 |
| 1255 | MW305624 | Arg12908    | Argentina     | 2014 | GII.P31 |
| 1256 | MW305626 | Arg13435    | Argentina     | 2014 | GII.P31 |
| 1257 | MW305632 | Arg14249    | Argentina     | 2015 | GII.P16 |
| 1258 | MW305633 | Arg14493    | Argentina     | 2016 | GII.P16 |
| 1259 | MW305634 | Arg14617    | Argentina     | 2016 | GII.P16 |
| 1260 | MW305636 | Arg14735    | Argentina     | 2016 | GII.P16 |
| 1261 | MW305637 | Arg14741    | Argentina     | 2016 | GII.P16 |
| 1262 | MW305639 | Arg14774    | Argentina     | 2016 | GII.P16 |
| 1263 | MW305647 | Arg15983    | Argentina     | 2017 | GII.P16 |
| 1264 | MW305680 | 11632-c2    | Japan         | 2013 | GII.P31 |
| 1265 | MW305708 | CMH-N033-18 | Thailand      | 2018 | GII.P16 |
| 1266 | MW305723 | CMH-N010-18 | Thailand      | 2018 | GII.P16 |
| 1267 | MW305738 | JW2015      | United States | 2015 | GII.P31 |
| 1268 | MW363192 | SA068       | Germany       | 2014 | NA      |
| 1269 | MW363193 | SA409       | Germany       | 2014 | NA      |
| 1270 | MW363194 | SA940       | Germany       | 2014 | NA      |
| 1271 | MW363195 | SA188       | Germany       | 2014 | NA      |
| 1272 | MW363196 | A690        | Germany       | 2016 | NA      |
| 1273 | MW521099 | B4382       | Thailand      | 2017 | NA      |
| 1274 | MW521100 | B4427       | Thailand      | 2017 | NA      |
| 1275 | MW521101 | B4501       | Thailand      | 2018 | NA      |
| 1276 | MW521102 | B4545       | Thailand      | 2018 | NA      |
| 1277 | MW521103 | B4554       | Thailand      | 2018 | NA      |
| 1278 | MW521104 | B4615       | Thailand      | 2018 | NA      |
| 1279 | MW521105 | B4729       | Thailand      | 2018 | NA      |
| 1280 | MW521106 | B4750       | Thailand      | 2017 | NA      |
| 1281 | MW521107 | B4767       | Thailand      | 2017 | NA      |
| 1282 | MW521108 | B4796       | Thailand      | 2018 | NA      |
| 1283 | MW521109 | B4891       | Thailand      | 2018 | NA      |
| 1284 | MW521110 | B4923       | Thailand      | 2018 | NA      |
| 1285 | MW521111 | B4951       | Thailand      | 2018 | NA      |
| 1286 | MW521112 | B5006       | Thailand      | 2018 | NA      |
| 1287 | MW521113 | B5073       | Thailand      | 2018 | NA      |
| 1288 | MW521114 | B5183       | Thailand      | 2018 | NA      |
| 1289 | MW521115 | B5215       | Thailand      | 2018 | NA      |
| 1290 | MW521116 | B5452       | Thailand      | 2018 | NA      |
| 1291 | MW521117 | B5544       | Thailand      | 2018 | NA      |
| 1292 | MW521118 | B6181       | Thailand      | 2018 | NA      |
| 1293 | MW521119 | B6267       | Thailand      | 2018 | NA      |
| 1294 | MW521120 | B6360       | Thailand      | 2018 | NA      |
| 1295 | MW521121 | B6399       | Thailand      | 2018 | NA      |
| 1296 | MW521122 | B6521       | Thailand      | 2018 | NA      |

|      |          |                 |          |      |         |
|------|----------|-----------------|----------|------|---------|
| 1297 | MW521123 | B6670           | Thailand | 2019 | NA      |
| 1298 | MW521124 | B6740           | Thailand | 2019 | NA      |
| 1299 | MW521125 | B7151           | Thailand | 2019 | NA      |
| 1300 | MW521126 | B7265           | Thailand | 2019 | NA      |
| 1301 | MW521127 | B7446           | Thailand | 2019 | NA      |
| 1302 | MW521128 | B7470           | Thailand | 2020 | NA      |
| 1303 | MW521129 | B7646           | Thailand | 2020 | NA      |
| 1304 | MW521130 | B7826           | Thailand | 2020 | NA      |
| 1305 | MW559990 | KLF_NOV_004     | Kenya    | 2019 | GII.P31 |
| 1306 | MW559991 | KLF_NOV_003     | Kenya    | 2019 | GII.P31 |
| 1307 | MW559992 | KLF_NOV_005     | Kenya    | 2019 | GII.P31 |
| 1308 | MW559993 | KLF_NOV_002     | Kenya    | 2019 | GII.P31 |
| 1309 | MW559994 | KLF_NOV_001     | Kenya    | 2019 | GII.P31 |
| 1310 | MW661248 | BMH13-039       | Canada   | 2013 | GII.P31 |
| 1311 | MW661251 | BMH15-059       | Canada   | 2015 | GII.P31 |
| 1312 | MW661252 | BMH15-063       | Canada   | 2015 | GII.P31 |
| 1313 | MW661254 | BMH16-074       | Canada   | 2016 | GII.P16 |
| 1314 | MW661256 | BMH18-085       | Canada   | 2018 | GII.P16 |
| 1315 | MW661258 | BMH19-090       | Canada   | 2019 | GII.P16 |
| 1316 | MW661259 | BMH19-092       | Canada   | 2019 | GII.P16 |
| 1317 | MW661260 | BMH19-093       | Canada   | 2019 | GII.P16 |
| 1318 | MW661261 | BMH19-094       | Canada   | 2019 | GII.P16 |
| 1319 | MW661264 | BMH19-097       | Canada   | 2019 | GII.P16 |
| 1320 | MW661278 | BMH19-127       | Canada   | 2019 | GII.P16 |
| 1321 | MW661279 | BMH19-128       | Canada   | 2019 | GII.P16 |
| 1322 | MW661280 | BMH19-129       | Canada   | 2019 | GII.P16 |
| 1323 | MW661281 | BMH19-130       | Canada   | 2019 | GII.P31 |
| 1324 | MW661282 | BMH19-132       | Canada   | 2019 | GII.P16 |
| 1325 | MW661283 | BMH19-137       | Canada   | 2019 | GII.P16 |
| 1326 | MW699633 | NICED-BCH-9620  | India    | 2018 | GII.P16 |
| 1327 | MW703834 | BCH-9733        | India    | 2018 | GII.P16 |
| 1328 | MW703835 | BCH-10054       | India    | 2018 | GII.P16 |
| 1329 | MW703836 | NICED-BCH-10765 | India    | 2019 | GII.P16 |
| 1330 | MW709576 | NICED-BCH-10863 | India    | 2019 | GII.P16 |
| 1331 | MW709577 | NICED-BCH-11255 | India    | 2019 | GII.P16 |
| 1332 | MW709578 | NICED-BCH-11602 | India    | 2019 | GII.P16 |
| 1333 | MW709579 | NICED-BCH-11605 | India    | 2019 | GII.P16 |
| 1334 | MW709580 | NICED-BCH-11612 | India    | 2019 | GII.P16 |
| 1335 | MW709581 | NICED-BCH-11668 | India    | 2019 | GII.P16 |
| 1336 | MW709582 | NICED-BCH-11709 | India    | 2019 | GII.P16 |
| 1337 | MW709583 | NICED-BCH-11710 | India    | 2019 | GII.P16 |
| 1338 | MW709584 | NICED-BCH-11725 | India    | 2019 | GII.P16 |
| 1339 | MW709585 | NICED-BCH-11726 | India    | 2019 | GII.P16 |
| 1340 | MW709586 | NICED-BCH-11748 | India    | 2019 | GII.P16 |
| 1341 | MW709587 | NICED-BCH-11770 | India    | 2019 | GII.P16 |
| 1342 | MW709588 | NICED-BCH-11778 | India    | 2019 | GII.P16 |
| 1343 | MW709589 | NICED-BCH-11872 | India    | 2019 | GII.P16 |
| 1344 | MW709590 | NICED-BCH-11974 | India    | 2019 | GII.P16 |
| 1345 | MW709591 | NICED-BCH-12012 | India    | 2019 | GII.P16 |
| 1346 | MW711330 | NICED-BCH-12017 | India    | 2019 | GII.P16 |
| 1347 | MW711332 | NICED-BCH-12074 | India    | 2019 | GII.P16 |
| 1348 | MW711333 | NICED-BCH-12083 | India    | 2019 | GII.P16 |

|      |          |                 |                |      |         |
|------|----------|-----------------|----------------|------|---------|
| 1349 | MW711334 | NICED-BCH-12085 | India          | 2019 | GII.P16 |
| 1350 | MW711335 | NICED-BCH-12109 | India          | 2019 | GII.P16 |
| 1351 | MW711336 | NICED-BCH-12112 | India          | 2019 | GII.P16 |
| 1352 | MW711337 | NICED-BCH-12118 | India          | 2019 | GII.P16 |
| 1353 | MW711338 | NICED-BCH-12150 | India          | 2019 | GII.P16 |
| 1354 | MW711339 | NICED-BCH-12157 | India          | 2019 | GII.P16 |
| 1355 | MW711340 | NICED-BCH-12172 | India          | 2019 | GII.P16 |
| 1356 | MW711341 | NICED-BCH-12187 | India          | 2019 | GII.P16 |
| 1357 | MW725358 | NIC-NV-390      | India          | 2018 | GII.P16 |
| 1358 | MW725359 | NIC-NV-1415     | India          | 2019 | GII.P16 |
| 1359 | MW725360 | IDH-11218       | India          | 2018 | GII.P16 |
| 1360 | MW725361 | IDH-11405       | India          | 2018 | GII.P16 |
| 1361 | MW725362 | IDH-12747       | India          | 2019 | GII.P16 |
| 1362 | MW726099 | BCH-8930        | India          | 2018 | GII.P16 |
| 1363 | MW726100 | BCH-9662        | India          | 2018 | GII.P16 |
| 1364 | MW981327 | HY-1            | China          | 2019 | GII.P31 |
| 1365 | MZ376651 | 2012            | United Kingdom | 2014 | NA      |
| 1366 | MZ478136 | G4_11           | Mexico         | 2016 | GII.P16 |
| 1367 | MZ478139 | G9_4.5          | Mexico         | 2016 | GII.P16 |
| 1368 | MZ478140 | G11_6           | Mexico         | 2016 | GII.P16 |
| 1369 | MZ478141 | G19_10          | Mexico         | 2017 | GII.P16 |
| 1370 | MZ546176 | Norozj-2        | China          | 2016 | GII.P31 |
| 1371 | MZ546177 | Norozj-4        | China          | 2016 | GII.P31 |
| 1372 | MZ546178 | Norozj-5        | China          | 2016 | GII.P31 |
| 1373 | MZ546179 | Norozj-6        | China          | 2016 | GII.P31 |
| 1374 | MZ546180 | Norozj-7        | China          | 2016 | GII.P31 |
| 1375 | MZ546181 | Norozj-8        | China          | 2016 | GII.P31 |
| 1376 | MZ546183 | Norozj-10       | China          | 2016 | GII.P31 |
| 1377 | MZ958411 | Nizhny_Novgorod | Russia         | 2017 | GII.P16 |
| 1378 | OK148516 | GZ19            | China          | 2018 | NA      |
| 1379 | OL336342 | 12121164        | China          | 2012 | NA      |
| 1380 | OL336343 | 13023130        | China          | 2013 | NA      |
| 1381 | OL336344 | 14051034        | China          | 2014 | NA      |
| 1382 | OL336345 | 15023071        | China          | 2015 | NA      |
| 1383 | OL336346 | 16121024        | China          | 2016 | NA      |
| 1384 | OL336347 | 17121019        | China          | 2017 | NA      |
| 1385 | OL336348 | 18023157        | China          | 2018 | NA      |
| 1386 | OL336349 | 1914Y151        | China          | 2019 | NA      |
| 1387 | OL336350 | 20011115        | China          | 2020 | NA      |
| 1388 | OL336351 | 2105Y0824       | China          | 2021 | NA      |
| 1389 | OL336352 | 2105Y1677       | China          | 2021 | NA      |
| 1390 | OL336353 | 2105Y1888       | China          | 2021 | NA      |
| 1391 | OL336354 | 2105Y1889       | China          | 2021 | NA      |
| 1392 | OL336355 | 2105y1919       | China          | 2021 | NA      |
| 1393 | OL336356 | 2105Y1920       | China          | 2021 | NA      |
| 1394 | OL336357 | 2105Y1922       | China          | 2021 | NA      |
| 1395 | OL336358 | 20051042        | China          | 2020 | NA      |
| 1396 | OL336359 | 21011037        | China          | 2021 | NA      |
| 1397 | OL336360 | 20121007        | China          | 2020 | NA      |
| 1398 | OL336361 | 20153074        | China          | 2020 | NA      |
| 1399 | OL336362 | 2005Y130        | China          | 2020 | NA      |
| 1400 | OL336363 | 21121067        | China          | 2021 | NA      |



|      |          |                 |               |      |         |
|------|----------|-----------------|---------------|------|---------|
| 1401 | OL336364 | 1908Y813        | China         | 2019 | NA      |
| 1402 | OL336365 | 21161058        | China         | 2021 | NA      |
| 1403 | OL336366 | 21161051        | China         | 2021 | NA      |
| 1404 | OL336367 | 20161008        | China         | 2020 | NA      |
| 1405 | OL336382 | 19121200        | China         | 2019 | GII.P16 |
| 1406 | OL336383 | 20062001        | China         | 2020 | GII.P16 |
| 1407 | OL336384 | 20051046        | China         | 2020 | GII.P16 |
| 1408 | OL336385 | 21063054        | China         | 2021 | GII.P16 |
| 1409 | OL336386 | 1915Y216        | China         | 2019 | GII.P16 |
| 1410 | OL336387 | 20153072        | China         | 2020 | GII.P16 |
| 1411 | OL336388 | 21161049        | China         | 2021 | GII.P16 |
| 1412 | OL336389 | 21051018        | China         | 2021 | GII.P16 |
| 1413 | OL546296 | 14051141        | China         | 2014 | NA      |
| 1414 | OL721917 | P6              | China         | 2017 | GII.P31 |
| 1415 | OL898508 | Rochester14691  | United States | 2015 | GII.P31 |
| 1416 | OL898509 | Nashville13076  | United States | 2015 | GII.P31 |
| 1417 | OL898510 | Nashville13089  | United States | 2015 | GII.P31 |
| 1418 | OL898511 | Cincinnati10188 | United States | 2015 | GII.P31 |
| 1419 | OL898512 | Kansas11006     | United States | 2015 | GII.P16 |
| 1420 | OL898514 | Kansas0843      | United States | 2016 | GII.P16 |
| 1421 | OL898515 | Kansas1621      | United States | 2017 | GII.P16 |
| 1422 | OL898516 | Kansas0853      | United States | 2017 | GII.P4  |
| 1423 | OL913976 | Houston11006    | United States | 2015 | GII.P31 |
| 1424 | OL913977 | Houston11136    | United States | 2015 | GII.P31 |
| 1425 | OM368933 | FS159           | China         | 2018 | GII.P31 |
| 1426 | OM372476 | FS161-2         | China         | 2018 | GII.P31 |
| 1427 | OM372477 | FS163           | China         | 2018 | GII.P31 |
| 1428 | OM372478 | FS167           | China         | 2018 | GII.P31 |
| 1429 | OM372479 | FS168           | China         | 2018 | GII.P31 |
| 1430 | OM372480 | FS177           | China         | 2018 | GII.P31 |
| 1431 | OM372481 | FS178           | China         | 2018 | GII.P31 |
| 1432 | OM372485 | FS560           | China         | 2019 | GII.P31 |
| 1433 | OM372490 | FS744           | China         | 2019 | GII.P31 |
| 1434 | OM372672 | FS180           | China         | 2018 | GII.P31 |
| 1435 | OM372682 | FS192           | China         | 2018 | GII.P31 |
| 1436 | OM373200 | FS203           | China         | 2018 | GII.P31 |
| 1437 | OM373207 | FS236           | China         | 2018 | GII.P31 |
| 1438 | OM373210 | FS241           | China         | 2018 | GII.P31 |
| 1439 | OM373317 | FS257           | China         | 2018 | GII.P31 |
| 1440 | OM373532 | FS273           | China         | 2018 | GII.P31 |
| 1441 | OM373624 | FS290           | China         | 2018 | GII.P31 |
| 1442 | OM373643 | FS303           | China         | 2018 | GII.P31 |
| 1443 | OM373654 | FS480           | China         | 2019 | GII.P31 |
| 1444 | OM386670 | FS578           | China         | 2019 | GII.P31 |
| 1445 | OM386814 | FS686           | China         | 2019 | GII.P31 |
| 1446 | OM386843 | FS759           | China         | 2019 | GII.P31 |
| 1447 | OM980238 | 3915VLC         | Spain         | 2019 | GII.P31 |
| 1448 | OM980239 | 3973VLC         | Spain         | 2019 | GII.P31 |
| 1449 | OM980240 | 4008ALC         | Spain         | 2019 | GII.P4  |

---
